# Supplementary material for: Risk assessment of patient factors and medications for drug-related problems from a prospective longitudinal study of newborns admitted to a neonatal intensive care unit in Brazil
Source: PubMed Central journal article supplement — BMJ Open. 2019 Jul 10;9(7):e024377. doi: 10.1136/bmjopen-2018-024377 (PMC6624048; doi:10.1136/bmjopen-2018-024377), 2019-07-10
Supplement: bmjopen-2018-024377.draft_revisions.pdf [file bmjopen-2018-024377.draft_revisions.pdf]

# BMJ Open

BMJ Open is committed to open peer review. As part of this commitment we make the peer review history of every article we publish publicly available.

When an article is published we post the peer reviewers' comments and the authors' responses online. We also post the versions of the paper that were used during peer review. These are the versions that the peer review comments apply to.

The versions of the paper that follow are the versions that were submitted during the peer review process. They are not the versions of record or the final published versions. They should not be cited or distributed as the published version of this manuscript.

BMJ Open is an open access journal and the full, final, typeset and author-corrected version of record of the manuscript is available on our site with no access controls, subscription charges or pay-per-view fees (<http://bmjopen.bmj.com>).

If you have any questions on BMJ Open's open peer review process please email [info.bmjopen@bmj.com](mailto:info.bmjopen@bmj.com)

# BMJ Open

## A risk assessment of patient factors and medications in drug-related problems in neonatal intensive care

|                               |                                                                                                                                                                                                                                                                                                                                                                                                                                                                                                                                                      |
|-------------------------------|------------------------------------------------------------------------------------------------------------------------------------------------------------------------------------------------------------------------------------------------------------------------------------------------------------------------------------------------------------------------------------------------------------------------------------------------------------------------------------------------------------------------------------------------------|
| Journal:                      | <i>BMJ Open</i>                                                                                                                                                                                                                                                                                                                                                                                                                                                                                                                                      |
| Manuscript ID                 | bmjopen-2018-024377                                                                                                                                                                                                                                                                                                                                                                                                                                                                                                                                  |
| Article Type:                 | Research                                                                                                                                                                                                                                                                                                                                                                                                                                                                                                                                             |
| Date Submitted by the Author: | 23-May-2018                                                                                                                                                                                                                                                                                                                                                                                                                                                                                                                                          |
| Complete List of Authors:     | Leopoldino, Ramon Weyler; Universidade Federal do Rio Grande do Norte Centro de Ciencias da Saude, Pharmacy<br>Santos, Marco; Universidade Federal do Rio Grande do Norte Maternidade Escola Januário Cicco<br>Costa, Tatiana; Universidade Federal do Rio Grande do Norte Maternidade Escola Januário Cicco<br>Martins, Rand; Universidade Federal do Rio Grande do Norte Centro de Ciencias da Saude, Department of Pharmacy<br>Oliveira, António; Universidade Federal do Rio Grande do Norte Centro de Ciencias da Saude, Department of Pharmacy |
| Keywords:                     | Neonatal intensive & critical care < INTENSIVE & CRITICAL CARE, Health & safety < HEALTH SERVICES ADMINISTRATION & MANAGEMENT, Adverse events < THERAPEUTICS                                                                                                                                                                                                                                                                                                                                                                                         |
|                               |                                                                                                                                                                                                                                                                                                                                                                                                                                                                                                                                                      |

SCHOLARONE™  
Manuscripts

**Title:** A risk assessment of patient factors and medications in drug-related problems in neonatal intensive care

**Running title:** Drug-related problems in neonatal care

**Authors:** Ramon D. Leopoldino<sup>1</sup>, Marco T. Santos<sup>2</sup>, Tatiana X. Costa<sup>2</sup>, Rand R. Martins<sup>1</sup>, António G. Oliveira<sup>1</sup>

**Affiliation of authors:**

1. Department of Pharmacy, Centro de Ciências da Saúde, Universidade Federal do Rio Grande do Norte, Natal, Brazil.

2. Maternity School Januário Cicco, Universidade Federal do Rio Grande do Norte, Natal, Brazil.

**Correspondence to:** Mr Ramon D. Leopoldino, PharmD; ramon.weyler@gmail.com.

**Key words:** Neonatal intensive & critical care; Health & safety; Adverse events

**Abstract:** 252 words

**Text:** 2,480 words

**Tables and Figures:** 4

## ABSTRACT

**Objectives:** It is believed that drug-related problems (DRP) are potentially serious in neonates, however, information for neonatal intensive care units (NICU) is scarce. This study aims to identify patient factors and medications associated with the occurrence of DRPs in NICUs.

**Design:** Prospective cohort study.

**Setting:** NICU of a teaching hospital in Brazil.

**Participants:** The data were collected from the records of the clinical pharmacy service of all neonates admitted between January 2014 and November 2016, excluding neonates with length of stay in the NICU < 24 hours or without prescribed drugs.

**Primary outcome measures:** Risk factors and risk medicines for PRM.

**Results:** The study observed 600 neonates who spent a median of 14 NICU days (range 2 – 278 days). Most neonates (59.8%) were exposed to DRPs. The factors independently associated with DRPs were gestational age (adjusted odds-ratio (AOR) 0.85, 95% confidence interval (CI) 0.84–0.89), 5-minute APGAR < 7 (AOR 1.74, 95% CI 1.00–1.13), neurological disease (AOR 2.30, 95%CI 1.02–5.21), renal disease (AOR 5.88, 95%CI 1.93–17.9) and cardiac disease (AOR 2.80, 95%CI 1.50–5.22). The risk medications for DRP were vancomycin (AOR 3.88), amphotericin B (AOR 3.80), alprostadil (AOR 3.38), meropenem (AOR 3.33), ciprofloxacin (AOR 3.03), gentamicin (AOR 2.69), amikacin (AOR 1.97), cefepime (AOR 1.80) and omeprazole (AOR 1.67). These medicines represent one-third of all prescribed drugs.

**Conclusions:** Gestational age, 5-minute APGAR < 7 and neurological, cardiac and renal disease are risk factors for DRP in NICUs. Alprostadil, omeprazole and several anti-infectives were associated with greater risk of DRPs.

## STRENGTHS AND LIMITATIONS OF THIS STUDY

- This is the first study identifying patient variables and drugs associated with the occurrence of Drug-related problems (DRP), exclusively in Neonatal Intensive Care Unit (NICU) patients.
- The validity of the results is strengthened by the large cohort size, the prospective data collection, the longitudinal design, the in-situ evaluation of DRPs and the adoption of a well-known DRP classification system.
- However, the data were obtained from a single institution, which may somehow impair the generalization of our findings.
- It is also possible that administration errors have been under-estimated by recording failures.

## INTRODUCTION

The Intensive Care Unit (ICU) is a complex environment, characterized by polypharmacy, transfusions and frequent surgical procedures.<sup>1</sup> Neonatal Intensive Care Units (NICU) may pose additional hazards to patient safety because of the frequent usage of off-label and unlicensed medicines and of decimal dilutions of intravenous medicines.<sup>2, 3</sup> In addition, because of their physiological immaturity and rapid growth, neonates exhibit large interindividual variability in drug metabolism and excretion.<sup>2</sup> Such characteristics may predispose neonates to drug-related problems (DRP).

DRPs are events or circumstances that, actually or potentially, interfere in the patient's pharmacotherapy and that may lead to undesired clinical outcomes.<sup>4</sup> Those events include errors in the drug therapy processes (prescription, dispensation and administration) and adverse drug events (any untoward event related to medication that results in harm to the patient).<sup>5-7</sup>

In pediatric wards, about half of the patients are exposed to DRPs and most of these are preventable.<sup>8</sup> However, there is very little information on DRPs in children in intensive care units, especially among neonates.

It is believed that DRPs are particularly frequent and serious in neonates.<sup>9, 10</sup> Neonates are very sensitive to dose variations because of their particular pharmacokinetics and pharmacodynamics, consequence of the lower drug metabolism and clearance, low levels of plasma proteins, high proportion of body water and level of receptor expression and sensitivity.<sup>11, 12</sup> Some authors have shown that harm involving medicines is common in NICUs, with incidence rates ranging from 10 to 20 cases per 1,000 patient-days.<sup>13, 14</sup> Such harm can lead to prolonged hospitalization time and, in extreme cases, to the death of patients. It also generates an increase in hospital costs.<sup>13, 15</sup> Thus, the development of effective

1  
2  
3 preventive strategies directed to DRPs is of great relevance for the improvement of health  
4 care and one step towards this goal is the identification of patients susceptible to DRPs.<sup>16</sup>  
5  
6

7 Therefore, the purpose of this study was to identify risk factors for DRPs in NICU and  
8 to assess the risk associated with commonly used medications.  
9  
10

## 11 12 13 **METHODS**

14  
15 This study was an observational, prospective cohort study that was conducted from  
16 January 2014 to November 2016 in the 20-bed NICU of a teaching maternity hospital  
17 specialized in high-risk pregnancy. All neonates with a NICU stay longer than 24 hours and  
18 who had at least one prescribed drug were included in the study. Neonates who were  
19 prescribed exclusively with electrolytes, parenteral nutrition, blood products, oxygen therapy,  
20 diagnostic agents, and vitamin and mineral supplements were excluded from the study, as  
21 those products were not considered as drugs.  
22  
23  
24  
25  
26  
27  
28  
29

30  
31 The data collected from each neonate included sex, gestational age, birth weight, type  
32 of delivery (vaginal or caesarean), occurrence of premature rupture of membranes (PROM),  
33 1-minute and 5-minute APGAR, a diagnosis of neurological, renal or cardiac disorder, and  
34 malformations. The APGAR is a score that evaluates the birth condition of newborns in the  
35 first and fifth minutes of life, values below seven being considered an ominous sign.<sup>17</sup>  
36  
37  
38  
39  
40

41  
42 Throughout the hospitalization period, every neonate was evaluated for the number of  
43 clinical problems, number of prescribed drugs and occurrence of DRPs. The identification of  
44 DRPs was performed by the NICU clinical pharmacy team (a chief pharmacist and four  
45 assistant pharmacists) through the review of medical charts, medication orders and nursing  
46 records. For each identified DRP, its causes were then classified according to the  
47 Pharmaceutical Care Network Europe system v.6.2.<sup>4</sup> This classification was carried out  
48 independently by two pharmacists (RDL and MTS), supported by the Neofax® textbook  
49  
50  
51  
52  
53  
54  
55  
56  
57  
58  
59  
60

1  
2  
3 (Thomson Reuters, New York, USA), as well as the Micromedex® (Truven Health Analytics,  
4 Michigan, USA) and Uptodate® (WoltersKluwer, Alphenaan den Rijn, NL) databases. A third  
5 pharmacist (TXC) was consulted when there was lack of consensus between the two  
6  
7 evaluators.  
8  
9

### 10 11 12 13 **Statistical analysis**

14  
15 The defined sample size of 600 subjects would afford 70% power to identify associations with  
16 an odds-ratio of 1.30 or more. All variables are described by mean  $\pm$  standard deviation, or as  
17 absolute and relative frequency, as appropriate. For the identification of risk factors of DRP,  
18 the set of patient variables whose association with DRPs was statistically significant at the  
19 0.10 significance level in univariate logistic regression was analyzed by backward stepwise  
20 multiple logistic regression, and those variables significant at the 0.05 level were retained in  
21 the final model. Results are presented as adjusted odds-ratios (AOR) and 95% confidence  
22 intervals (CI). For the estimation of the risk of DRP associated with medications commonly  
23 used in a NICU, each prescribed drug was analyzed by a multiple logistic regression model  
24 adjusted by the risk factors identified in the previous analysis. Statistical analysis was  
25 performed with Stata 11 (Stata Corporation, College Station, TX, USA).  
26  
27  
28  
29  
30  
31  
32  
33  
34  
35  
36  
37  
38  
39  
40  
41

### 42 **RESULTS**

43  
44 During the 35-month study period, a total of 634 newborns were admitted to the NICU. Of  
45 these, 19 newborns were excluded (17 because they had no drugs prescribed and two patients  
46 in whom the length of stay was less than 24 hours). Six hundred fifteen newborns remained  
47 eligible but 15 (2.44%) were excluded from the analysis because they had missing  
48 pharmacotherapy follow-up data. The analysis set of 600 newborns was observed for a total  
49 of 16,335 NICU days, with a median of 14 days (range 2 – 278 days). The study population  
50  
51  
52  
53  
54  
55  
56  
57  
58  
59  
60



1  
2  
3 consisted of 313 males (53.6%) and the mean gestational age was  $31.9 \pm 4.1$  weeks. On  
4  
5 average,  $8.3 \pm 6.1$  medicines were prescribed to each newborn during the NICU stay. A total  
6  
7 of 1,142 DRPs were identified, with a mean of  $1.9 \pm 2.6$  DRPs per patient. More than half of  
8  
9 the newborns had one or more DRPs (59.8%, 359). Seventy-six neonates died during the  
10  
11 study (Table 1).

12  
13 DRPs were associated with increased length of stay ( $39.8 \pm 41.8$  days vs.  $11.2 \pm 10.3$   
14  
15 days,  $p < 0.001$ ), number of prescribed drugs ( $10.7 \pm 6.5$  vs.  $4.7 \pm 3.0$ ,  $p < 0.001$ ) and number of  
16  
17 clinical problems ( $5.54 \pm 2.78$  vs.  $3.38 \pm 1.57$ ,  $p < 0.001$ ) but not with a fatal outcome (12.3% vs.  
18  
19 13.3%,  $p = 0.71$ ).

20  
21  
22 As shown in Table 2, univariate logistic regression analysis identified eight patient  
23  
24 variables associated with DRPs: gestational age, birth weight, vaginal delivery, 1-minute and  
25  
26 5-minute APGAR, neurological disorder, renal disorder, and cardiovascular disorder. In the  
27  
28 multivariate logistic regression model, five remained significant: lower gestational age  
29  
30 (adjusted odds-ratio (AOR) 0.85), 5-minute APGAR  $< 7$  (AOR 1.74), neurological disorder  
31  
32 (AOR 2.30), renal disorder (AOR 5.88) and cardiac disorder (AOR 2.80) were risk factors for  
33  
34 DRPs.

35  
36  
37 Table 3 shows the medicines for which an estimate of the odds-ratio of DRP, adjusted  
38  
39 for gestational age, 5-minute APGAR, neurological disorder, renal disorder, and cardiac  
40  
41 disorder, could be obtained. The medications, and corresponding adjusted odds-ratios, are  
42  
43 vancomycin (AOR 3.88), amphotericin B (AOR 3.80), alprostadil (AOR 3.38), meropenem  
44  
45 (AOR 3.33), ciprofloxacin (AOR 3.03), gentamicin (AOR 2.69), amikacin (AOR 1.97),  
46  
47 cefepime (AOR 1.80) and omeprazole (AOR 1.67).

48  
49  
50 The frequency of prescription, and the prevalence of DRPs related to those  
51  
52 medications are also displayed in Table 3. These nine drugs represent 28.1% (1398/4970) of  
53  
54 all medications prescribed in the NICU and accounted for 50.6% (644/1273) of DRPs  
55  
56  
57  
58  
59

1  
2  
3 involving medications. The most prescribed medicines in the group were gentamicin (10.5%,  
4 523) and meropenem (3.1%, 154), and these drugs were also the most often involved in DRPs  
5 (17.3%, 220 and 7.9%, 101 respectively).  
6  
7

8  
9 As for the causes of DRPs involving the nine medicines (Table 4), dose selection was  
10 the most common cause for amikacin (62.7%), gentamicin (62.3%), meropenem (39.6%),  
11 cefepime (38.1%) and ciprofloxacin (33.3%). DRPs involving omeprazole (53.57%),  
12 amphotericin B (45.5%) and alprostadil (25.0%) were most often related to drug use. Another  
13 cause involving alprostadil (25.0%) was adverse reactions. Vancomycin (40.4%) was most  
14 often implicated in errors of prescription logistics.  
15  
16  
17  
18  
19  
20  
21  
22  
23

## 24 **DISCUSSION**

25  
26 In our study, we observed that neonates with low gestational age, low 5-minute  
27 APGAR, neurological disorder, renal disorder and cardiac disorder are more likely to have  
28  
29  
30  
31  
32  
33  
34  
35  
36  
37  
38  
39  
40  
41  
42  
43  
44  
45  
46  
47  
48  
49  
50  
51  
52  
53  
54  
55  
56  
57  
58  
59  
60  
DRP during their stay in NICU. An assessment of the risk of DRP was made for alprostadil,  
amikacin, amphotericin B, cefepime, ciprofloxacin, gentamicin, meropenem omeprazole and  
vancomycin. Such medicines accounted for less than one-third of the drugs prescribed in the  
NICU, and were involved in half of DRPs, the majority being related to drug dose and to drug  
use.

Only a few studies have identified risk factors for the occurrence of DRP in  
hospitalized patients. Most of those studies were conducted in adult and pediatric wards for  
periods under six months and enrolled fewer than 400 patients.<sup>18–21</sup> We performed a study in  
the NICU involving 600 neonates for a period of three years and presenting a set of different  
predictor variables. Comparisons to the results of other studies are therefore difficult. Even so,  
several risk factors related to DRP identified in our study, such as age and clinical problems

1  
2  
3 (cardiac, neurological and renal disorders), were also observed in the works of Urbina et al.<sup>16</sup>,  
4  
5 Peterson et al.<sup>20</sup> and Blix et al.<sup>22</sup> although those studies were conducted in adult patients.

6  
7 We also found that a low 5-minute APGAR was associated with a higher risk of DRP.  
8  
9 This predictor is a specific neonatology parameter that measures the condition of the newborn  
10  
11 at birth.<sup>23</sup> A low APGAR score usually represents a serious situation with the corresponding  
12  
13 need for several therapeutic interventions which, in turn, increase the risk of DRP.  
14

15  
16 The detection of the clinical variables associated with DRPs, as well as knowledge of  
17  
18 the risk of DRPs associated with each medication, represents a first step for the development  
19  
20 of preventive strategies for enhanced patient safety and improvements in the process of care.  
21  
22 Blix et al.<sup>22</sup> were the first authors to present risk estimates for drugs, while other papers<sup>8, 18 -</sup>  
23  
24 <sup>21, 24, 25</sup> have only described drugs involved in DRPs. We were able to quantify the risk of  
25  
26 DRP for a set of drugs that are involved in half of all DRPs, namely alprostadil, omeprazole  
27  
28 and several antimicrobials (amikacin, cefepime, ciprofloxacin, gentamicin, meropenem,  
29  
30 amphotericin B and vancomycin). Pawluk et al.<sup>24</sup> e Stavroudis et al.<sup>25</sup> claimed that the risk of  
31  
32 DRP associated with a medicine is directly related to the frequency of prescription. However,  
33  
34 our results show that the medicines with greater odds of DRPs (vancomycin and amphotericin  
35  
36 B) were not the most prescribed. These results suggest that the risk of DRP is primarily  
37  
38 associated with the chemical and pharmacological properties of a drug, therefore strongly  
39  
40 related to the level of difficulty on setting the appropriate dose and on the drug's potential for  
41  
42 adverse reactions, interactions and incompatibilities.  
43  
44

45  
46 Inappropriate dose selection was the most common cause of DRPs for  
47  
48 aminoglycosides, cefepime and meropenem. In neonates, the adjustment of dose and regimen  
49  
50 of antibiotics is extremely complex, the main reason for this being the rapid change in weight  
51  
52 during the first days of life, as well as significant heterogeneity in the maturation of organs  
53  
54 and systems across newborns.<sup>12, 26</sup> The lower than the recommended doses of those medicines  
55  
56  
57  
58  
59  
60

1  
2 administered in this study were often due to a delay in the adjustment of the medication dose  
3  
4 to the rapid weight gain of the neonate.  
5

6  
7 We observed that amphotericin B, ciprofloxacin and omeprazole were associated with  
8  
9 inappropriate drug use, specifically with drug administration error, with drug incompatibility  
10  
11 being the most frequent cause. Neonates have a high risk of exposure to drug  
12  
13 incompatibilities because of the limited number of intravenous accesses, often leading to  
14  
15 simultaneous administration of incompatible drugs through the same intravenous line. In  
16  
17 addition, the requirements for delivery of drugs in this population, such as dilutions and  
18  
19 reduced infusion rates, can lead to incompatibilities because of high concentrations and longer  
20  
21 time of contact between incompatible medicines.<sup>27</sup> Such problems may be implicated in  
22  
23 therapeutic failures due to drug degradation and even to thromboembolic complications,  
24  
25 including cases of deaths, due to the precipitate formed reaching the bloodstream.<sup>28-30</sup>  
26  
27

28  
29 Another medicine that had potential incompatibilities as the main cause of DRP was  
30  
31 alprostadil. However, this medicine stands out for the significant percentage of cases of  
32  
33 suspected adverse reactions. Fever, leukocytosis, dyspnea are reactions commonly observed  
34  
35 in the neonate soon after the administration of alprostadil.<sup>31</sup> Because of these reactions and  
36  
37 complications, this medication is for intensive therapy only.  
38

39  
40 The most common cause of vancomycin-related problems was errors of prescription  
41  
42 logistics. These errors are characterized by the lack of important information in the  
43  
44 prescription for the safe administration of the medications, or by the non-justifiable  
45  
46 prescription of non-standard medicines in the institution. The lack of information on the time  
47  
48 length of the infusion on the prescription was the most common error involving vancomycin,  
49  
50 an important problem because rapid infusions in less than 60 minutes can lead to macular or  
51  
52 maculopapular skin rashes (red man syndrome).<sup>32</sup>  
53  
54  
55  
56  
57  
58  
59  
60

1  
2  
3 This study has some limitations. The data were obtained from a single institution,  
4 which may somehow impair the generalization of our findings. Furthermore, as DRPs were  
5 identified from patient records and medical reports, it is possible that administration errors  
6 have been under-estimated by recording failures. However, the same methodology has been  
7 adopted by other studies in DRPs and, considering the scarcity of papers related to the topic  
8 of risk factors for DRPs in NICU patients, we believe that our results are relevant. The large  
9 cohort size, the prospective data collection, the longitudinal design, the in-situ evaluation of  
10 DRPs and the adoption of a well-known DRP classification system are methodological  
11 features that contribute to the validity of our results. To our knowledge, this is the first study  
12 identifying patient variables and drugs associated with the occurrence of DRPs, exclusively in  
13 NICU patients. The detection of those predictors is of great value for the identification of  
14 patients more prone to DRPs and, therefore, for the development of screening tools. Such  
15 tools can support the work of the healthcare team, especially the clinical pharmacist, with the  
16 strengthening of preventive strategies and the optimization of resources and time.  
17  
18  
19  
20  
21  
22  
23  
24  
25  
26  
27  
28  
29  
30  
31

32  
33 Further research is needed in order to deepen the study of factors associated with  
34 DRPs, aiming at the elaboration of risk stratification tools. Future studies should also analyze  
35 the influence of external factors on the incidence of DRPs, which have not been addressed in  
36 our study, such as the number and characteristics of the NICU team members, the workplace  
37 conditions, the intra-team and inter-team communication, and the organization of the hospital.  
38  
39  
40  
41  
42  
43  
44  
45  
46  
47  
48  
49  
50  
51  
52  
53  
54  
55  
56  
57  
58  
59  
60

## CONCLUSION

In conclusion, low gestational age, low 5-minute APGAR, neurological disorder, renal disorder and cardiac disorder are risk factors associated with the occurrence of DRPs. We also

1  
2  
3 list nine risk medications for DRP: vancomycin, amphotericin B, alprostadil, meropenem,  
4 ciprofloxacin, gentamicin, amikacin, cefepime and omeprazole. Although they are the most  
5 involved in DRPs, these medicines account for less than one-third of the drugs prescribed in  
6 NICU. Inappropriate dose selection and inappropriate drug use (mainly potential drug  
7 incompatibilities) were the main causes of DRP related to those medicines.  
8  
9  
10  
11  
12

13  
14  
15 **Acknowledgements** We are grateful to all pharmacists of the maternity hospital, especially to  
16 the pharmacists Dr. Elaine Alves and Dr. Tayne Cortez for contributing to the elaboration of  
17 the research project, the pharmacy residents Kadine Pontes and Bruna Nunes for making  
18 available the records of pharmacotherapeutic follow-up of patients, and pharmacy students  
19 Mayara Alves and Amanda Nascimento for helping in data collection and tabulation. We also  
20 thank all members of the NICU, physicians, physiotherapists, nurses and auxiliaries.  
21  
22  
23  
24  
25  
26  
27  
28  
29  
30

31 **Contributions** RDL participated in all stages of the study. MTS and TXC participated in the  
32 study design and revision of the manuscript. RRM and AGO contributed to the design and  
33 analysis of the study and the writing and revision of the manuscript. All authors approved the  
34 final version of the manuscript.  
35  
36  
37  
38  
39  
40

41 **Funding** This study received fund from the National Council of Technological and Scientific  
42 Development (CNPq).  
43  
44  
45  
46  
47

48 **Competing interests** None declared.  
49  
50  
51

52 **Ethics approval** This study was approved by the Institutional Review Board of the  
53 University Hospital Onofre Lopes (No. 580.201/2014), who waived the need for written  
54  
55  
56  
57  
58  
59  
60

1  
2 informed consent because the study only evaluated data collected from clinical pharmacy  
3 records.  
4  
5

6  
7  
8  
9 **Provenance and peer review** Not commissioned; externally peer reviewed.  
10

11  
12  
13 **Data sharing statement** No additional data available.  
14  
15

## 16 17 18 **References**

- 19  
20 1. Raju TNK, Suresh G, Higgins RD. Patient Safety in the Context of Neonatal Intensive  
21 Care: Research and Educational Opportunities. *Pediatr Res* 2011;70:109–15.  
22
- 23 2. Sorrentino E, Alegiani C. Medication errors in the neonate. *J Matern Fetal Neonatal Med*  
24 2012; 25:83–5.  
25
- 26 3. Chappell K, Newman C. Potential tenfold drug overdoses on a neonatal unit. *Arch Dis*  
27 *Child Fetal Neonatal Ed* 2004;89:F483–F484.  
28
- 29 4. Pharmaceutical Care Network Europe (PCNE). The PCNE Classification V 6.2. 2010  
30 [http://www.pcne.org/upload/files/11\\_PCNE\\_classification\\_V6-2.pdf/](http://www.pcne.org/upload/files/11_PCNE_classification_V6-2.pdf/) (accessed 15 April  
31 2018).  
32
- 33 5. Bates DW, Cullen DJ, Laird N, et al. Incidence of adverse drug events and potential adverse  
34 drug events: implication for prevention. *JAMA* 1995;274:29–34.  
35
- 36 6. Kaushal R, Bates DW, Landrigan C, et al. Medication errors and adverse drug events in  
37 pediatric inpatients. *JAMA* 2001;285:2114–20.  
38
- 39 7. van den Bemt PMLA, Egberts TCG, de Jong-van den Berg LTW, Brouwers JRBJ. Drug-  
40 related problems in hospitalised patients. *Drug Saf* 2000; 22:321–33.  
41  
42  
43  
44  
45  
46  
47  
48  
49  
50  
51  
52  
53  
54  
55  
56  
57  
58  
59  
60

- 1  
2  
3 8. Rashed AN, Neubert A, Tomlin S, Jackman J, Alhamdan H, AlShaikh A, et al.  
4  
5 Epidemiology and potential associated risk factors of drug-related problems in hospitalised  
6  
7 children in the United Kingdom and Saudi Arabia. *Eur J Clin Pharmacol* 2012;68:1657–66.  
8
- 9 9. Allegaert K, van den Anker JN. Adverse drug reactions in neonates and infants: a  
10  
11 population-tailored approach is needed. *Br J Clin Pharmacol* 2015;80:788–95.  
12
- 13 10. Fernandez-Llamazares CM, Calleja-Hernández M-Á, Manrique-Rodríguez S, Pérez-Sanz  
14  
15 C, Durán-García E, Sanjurjo-Sáez M. Prescribing errors intercepted by clinical pharmacists in  
16  
17 paediatrics and obstetrics in a tertiary hospital in Spain. *Eur J Clin Pharmacol* 2012;68:1339–  
18  
19 45.  
20
- 21 11. van den Anker JN. How to optimize the evaluation and use of antibiotics in neonates.  
22  
23 *Early Hum Dev* 2014; 90:10S–12S.  
24
- 25 12. Rodieux F, Wilbaux M, van den Anker JN, Pfister M. Effect of Kidney Function on Drug  
26  
27 Kinetics and Dosing in Neonates, Infants, and Children. *Clin Pharmacokinet.* 2015;54:1183–  
28  
29 204.  
30
- 31 13. Kunac DI, Kennedy J, Austin N, Reith D. Incidence, preventability, and impact of  
32  
33 Adverse Drug Events (ADEs) and potential ADEs in hospitalized children in New Zealand: a  
34  
35 prospective observational cohort study. *Paediatr Drugs* 2009; 11:153–60.  
36  
37
- 38 14. Sakuma M, Ida H, Nakamura T, Ohta Y, Yamamoto K, Seki S, et al. Adverse drug events  
39  
40 and medication errors in Japanese paediatric inpatients: a retrospective cohort study. *BMJ*  
41  
42 *Qual Saf* 2014;23:830–7.  
43
- 44 15. Ohta Y, Sakuma M, Koike K, Bates DW, Morimoto T. Influence of adverse drug events  
45  
46 on morbidity and mortality in intensive care units: the JADE study. *Int J Qual Health Care*  
47  
48 2014;26:573–8.  
49
- 50 16. Urbina O, Ferrández O, Grau S, et al. Design of a score to identify hospitalized patients at  
51  
52 risk of drug-related problems. *Pharmacoepidemiol Drug Saf* 2014;23: 923–32.  
53  
54  
55  
56  
57  
58  
59



- 1  
2  
3 17. Apgar V. A proposal for a new method of evaluation of the newborn infant. *Curr Res*  
4  
5 *Anesth Analg* 1953;32:260–7.  
6  
7 18. Birarra MK, Heye TB, Shibeshi W. Assessment of drug-related problems in pediatric  
8  
9 ward of Zewditu Memorial Referral Hospital, Addis Ababa, Ethiopia. *Int J Clin Pharm*  
10  
11 2017;39:1–8.  
12  
13 19. Khmour MR, Jarab AS, Adas HO, Samaro EZ, Mukattash TL, Hallak HO. Identification  
14  
15 of drug-related problems: a prospective study in two general hospitals. *Curr Clin Pharmacol*  
16  
17 2012;7:276–81.  
18  
19 20. Peterson C, Gustafsson M. Characterisation of drug-related problems and  
20  
21 associated factors at a clinical pharmacist service-naïve Hospital in Northern Sweden. *Drugs*  
22  
23 *Real World Outcomes* 2017;4:97–107.  
24  
25 21. Rashed AN, Wilton L, Lo CCH, Kwong BYS, Leung S, Wong ICK. Epidemiology and  
26  
27 potential risk factors of drug-related problems in Hong Kong paediatric wards. *Br J Clin*  
28  
29 *Pharmacol* 2014;77:873–9.  
30  
31 22. Blix HS, Viktil KK, Reikvam A, et al. The majority of hospitalised patients have drug-  
32  
33 related problems: results from a prospective study in general hospitals. *Eur J Clin Pharmacol*  
34  
35 2004;60:651–8.  
36  
37 23. American Academy of Pediatrics, Committee on Fetus and Newborn, American College  
38  
39 of Obstetricians and Gynecologists, Committee on Obstetric Practice. The Apgar Score.  
40  
41 *Pediatrics* 2006;117:1444–7.  
42  
43 24. Pawluk S, Jaam M, Hazi F, et al. A description of medication errors reported by  
44  
45 pharmacists in a neonatal intensive care unit. *Int J Clin Pharm* 2017;39:88–94.  
46  
47 25. Stavroudis TA, Shore AD, Morlock L, Hicks RW, Bundy D, Miller MR. NICU  
48  
49 medication errors: identifying a risk profile for medication errors in the neonatal intensive  
50  
51 care unit. *J Perinatol* 2010;459–68.  
52  
53  
54  
55  
56  
57  
58  
59

- 1  
2  
3 26. Wilbaux M, Fuchs A, Samardzic J, et al. Pharmacometric approaches to personalize use of  
4 primarily renally eliminated antibiotics in preterm and term neonates. *J Clin Pharmacol*  
5 2016;56:909–35.  
6  
7  
8  
9 27. Sherwin CMT, Medlicott NJ, Reith DM, Broadbent RS. Intravenous drug delivery in  
10 neonates: lessons learnt. *Arch Dis Child* 2014;99:590–4.  
11  
12  
13 28. Bradley JS, Wassel RT, Lee L, Nambiar S. Intravenous ceftriaxone and calcium in the  
14 neonate: assessing the risk for cardiopulmonary adverse events. *Pediatrics* 2009;123:e609 –  
15 13.  
16  
17  
18  
19 29. Kanji S, Lam J, Johanson C, Singh A, Goddard R, Fairbairn J, et al. Systematic review of  
20 physical and chemical compatibility of commonly used medications administered by  
21 continuous infusion in intensive care units. *Crit Care Med* 2010;38:1890–8.  
22  
23  
24  
25 30. Foinard A, Décaudin B, Barthélémy C, Debaene B, Odou P. Impact of physical  
26 incompatibility on drug mass flow rates: example of furosemide-midazolam incompatibility.  
27 *Ann Intensive Care* 2012;2:28.  
28  
29  
30  
31 31. Lewis AB, Freed MD, Heymann MA, Roehl SL, Kensey RC. Side effects of therapy with  
32 prostaglandin E1 in infants with critical congenital heart disease. *Circulation* 1981;64:893–8.  
33  
34  
35  
36 32. Levy M, Koren G, Dupuis L, Read SE. Vancomycin-induced red man syndrome.  
37 *Pediatrics* 1990;86:572–80.  
38  
39  
40  
41  
42  
43  
44  
45  
46  
47  
48  
49  
50  
51  
52  
53  
54  
55  
56  
57  
58  
59  
60

Table 1 – Demographic and clinical characteristics of the study population (n = 600)

| Characteristics                   | Value*         |
|-----------------------------------|----------------|
| Gestational age (weeks)           | 31.9 ± 4.1     |
| Female sex                        | 271 (46.4%)    |
| Birth weight (grams)              | 1779.4 ± 885.3 |
| Length of stay (days)             | 28.2 ± 35.8    |
| Vaginal delivery                  | 214 (36.3%)    |
| PROM                              | 165 (31.5%)    |
| 1-minute APGAR < 7                | 266 (46.6%)    |
| 5-minute APGAR < 7                | 78 (13.3%)     |
| Number of clinical conditions     | 4.7 ± 2.6      |
| Neurological disorders            | 49 (8.2%)      |
| Renal disorders                   | 52 (8.7%)      |
| Cardiac disorders                 | 98 (16.4%)     |
| Malformations                     | 67 (11.2%)     |
| Number of medications used        | 8.3 ± 6.1      |
| DRP (n = 1142)                    |                |
| Patients with DRP                 | 359 (59.8%)    |
| Average number of DRP per patient | 1.9 ± 2.6      |
| Death                             | 76 (12.7%)     |

\*Values are mean ± standard deviation or n (%).

PROM, premature rupture of membranes; DRP, drug-related problems.

Table 2— Factors associated with occurrence of drug-related problems in neonatal intensive care

| Characteristics          | Univariate analysis |       |       |       | Multivariate analysis |      |      |       |
|--------------------------|---------------------|-------|-------|-------|-----------------------|------|------|-------|
|                          | OR                  | 95%CI | p     | AOR   | 95%CI                 | p    |      |       |
| Gestational age in weeks | 0.87                | 0.84  | 0.91  | <0.01 | 0.85                  | 0.81 | 0.89 | <0.01 |
| Female sex               | 1.19                | 0.85  | 1.66  | 0.30  |                       |      |      |       |
| Birthweight (grams)      | 0.99                | 0.99  | 0.99  | <0.01 |                       |      |      |       |
| Vaginal delivery         | 1.57                | 1.10  | 2.21  | 0.01  |                       |      |      |       |
| PROM                     | 1.28                | 0.87  | 1.86  | 0.20  |                       |      |      |       |
| 1-minute APGAR <7        | 1.57                | 1.12  | 2.20  | <0.01 |                       |      |      |       |
| 5-minute APGAR <7        | 1.89                | 1.12  | 3.19  | 0.02  | 1.74                  | 1.00 | 3.13 | 0.05  |
| Neurological disorder    | 2.19                | 1.12  | 4.29  | 0.02  | 2.30                  | 1.02 | 5.21 | 0.05  |
| Renal disorder           | 9.17                | 3.26  | 25.79 | <0.01 | 5.88                  | 1.93 | 17.9 | <0.01 |
| Cardiac disorder         | 2.51                | 1.52  | 4.14  | <0.01 | 2.80                  | 1.50 | 5.22 | <0.01 |
| Malformations            | 1.54                | 0.89  | 2.65  | 0.12  |                       |      |      |       |

OR, odds-ratio; CI, confidence interval; AOR, adjusted odds-ratio; PROM, premature rupture of membranes.

Table 3 – Estimates of the risk of drug-related problems (DRP) associated with several drugs administered in NICUs, distributed by cases of DRP and frequency of prescription

| Medicines      | Adjusted Odds-ratio<br>(95%CI)* | Cases of DRPs (n =<br>1,273) |                    | Frequency of<br>prescriptions (n =<br>4,970) |      |
|----------------|---------------------------------|------------------------------|--------------------|----------------------------------------------|------|
|                |                                 | n                            | %                  | n                                            | %    |
|                |                                 | Vancomycin                   | 3.88 (1.54 – 9.81) | 99                                           | 7.8  |
| Amphotericin B | 3.80 (2.02 – 7.16)              | 44                           | 3.4                | 48                                           | 1.0  |
| Alprostadil    | 3.38 (1.67 – 6.84)              | 20                           | 1.6                | 35                                           | 0.7  |
| Meropenem      | 3.33 (1.72 – 6.49)              | 101                          | 7.9                | 154                                          | 3.1  |
| Ciprofloxacin  | 3.03 (1.34 – 6.85)              | 15                           | 1.2                | 25                                           | 0.5  |
| Gentamicin     | 2.69 (2.17 – 3.34)              | 220                          | 17.3               | 523                                          | 10.5 |
| Amikacin       | 1.97 (1.23 – 3.17)              | 75                           | 5.9                | 177                                          | 3.6  |
| Cefepime       | 1.80 (1.15 – 2.82)              | 42                           | 3.3                | 189                                          | 3.8  |
| Omeprazole     | 1.67 (1.06 – 2.62)              | 28                           | 2.2                | 145                                          | 2.9  |

\*Odds ratio adjusted for gestational age, 5-minute APGAR <7, neurological disorder, renal disorder and cardiac disorder. The p-value for each medicine was < 0.01.

CI, confidence interval.

Table 4 – Distribution of medicines associated with drug-related problems (DRP) in neonatal intensive care by main causes of DRP

| Medicines      | Causes of DRPs*                |                |             |                        |
|----------------|--------------------------------|----------------|-------------|------------------------|
|                | Adverse reactions <sup>†</sup> | Dose selection | Drug use    | Prescription logistics |
| Alprostadil    | 5 (25.0%)                      | 2 (10.0%)      | 5 (25.0%)   | 3 (15.0%)              |
| Amikacin       |                                | 47 (62.7%)     | 16 (21.3%)  | 8 (10.7%)              |
| Amphotericin B |                                | 6 (13.6%)      | 20 (45.5%)  | 10 (22.7%)             |
| Cefepime       |                                | 16 (38.1%)     | 11 (26.2%)  | 14 (33.3%)             |
| Ciprofloxacin  |                                | 5 (33.3%)      | 3 (20.0%)   | 4 (26.7%)              |
| Gentamicin     |                                | 137 (62.3%)    | 78 (35.4%)  | 3 (1.4%)               |
| Meropenem      |                                | 40 (39.6%)     | 25 (24.8%)  | 28 (27.7%)             |
| Omeprazole     |                                | 1 (3.57%)      | 15 (53.57%) | 12 (42.86%)            |
| Vancomycin     | 1 (1.0%)                       | 31 (31.3%)     | 24 (24.3%)  | 40 (40.4%)             |

\*Causes of DRPs according to the Pharmaceutical Care Network Europe (PCNE) classification system v.6.2.<sup>4</sup>

<sup>†</sup>Classified as others causes of DRP.

**STROBE 2007 (v4) checklist of items to be included in reports of observational studies in epidemiology\***  
**Checklist for cohort, case-control, and cross-sectional studies (combined)**

| Section/Topic             | Item # | Recommendation                                                                                                                                                                                                                                                                                                                                                                                                                                                         | Reported on page # |
|---------------------------|--------|------------------------------------------------------------------------------------------------------------------------------------------------------------------------------------------------------------------------------------------------------------------------------------------------------------------------------------------------------------------------------------------------------------------------------------------------------------------------|--------------------|
| Title and abstract        | 1      | (a) Indicate the study’s design with a commonly used term in the title or the abstract                                                                                                                                                                                                                                                                                                                                                                                 | 2                  |
|                           |        | (b) Provide in the abstract an informative and balanced summary of what was done and what was found                                                                                                                                                                                                                                                                                                                                                                    | 2                  |
| <b>Introduction</b>       |        |                                                                                                                                                                                                                                                                                                                                                                                                                                                                        |                    |
| Background/rationale      | 2      | Explain the scientific background and rationale for the investigation being reported                                                                                                                                                                                                                                                                                                                                                                                   | 4                  |
| Objectives                | 3      | State specific objectives, including any pre-specified hypotheses                                                                                                                                                                                                                                                                                                                                                                                                      | 4/5                |
| <b>Methods</b>            |        |                                                                                                                                                                                                                                                                                                                                                                                                                                                                        |                    |
| Study design              | 4      | Present key elements of study design early in the paper                                                                                                                                                                                                                                                                                                                                                                                                                | 5                  |
| Setting                   | 5      | Describe the setting, locations, and relevant dates, including periods of recruitment, exposure, follow-up, and data collection                                                                                                                                                                                                                                                                                                                                        | 5                  |
| Participants              | 6      | (a) <i>Cohort study</i> —Give the eligibility criteria, and the sources and methods of selection of participants. Describe methods of follow-up<br><i>Case-control study</i> —Give the eligibility criteria, and the sources and methods of case ascertainment and control selection. Give the rationale for the choice of cases and controls<br><i>Cross-sectional study</i> —Give the eligibility criteria, and the sources and methods of selection of participants | 5                  |
|                           |        | (b) <i>Cohort study</i> —For matched studies, give matching criteria and number of exposed and unexposed<br><i>Case-control study</i> —For matched studies, give matching criteria and the number of controls per case                                                                                                                                                                                                                                                 |                    |
| Variables                 | 7      | Clearly define all outcomes, exposures, predictors, potential confounders, and effect modifiers. Give diagnostic criteria, if applicable                                                                                                                                                                                                                                                                                                                               | 5                  |
| Data sources/ measurement | 8*     | For each variable of interest, give sources of data and details of methods of assessment (measurement). Describe comparability of assessment methods if there is more than one group                                                                                                                                                                                                                                                                                   | 5                  |
| Bias                      | 9      | Describe any efforts to address potential sources of bias                                                                                                                                                                                                                                                                                                                                                                                                              | 5                  |
| Study size                | 10     | Explain how the study size was arrived at                                                                                                                                                                                                                                                                                                                                                                                                                              | 5/6                |
| Quantitative variables    | 11     | Explain how quantitative variables were handled in the analyses. If applicable, describe which groupings were chosen and why                                                                                                                                                                                                                                                                                                                                           | 6                  |
| Statistical methods       | 12     | (a) Describe all statistical methods, including those used to control for confounding                                                                                                                                                                                                                                                                                                                                                                                  | 6                  |
|                           |        | (b) Describe any methods used to examine subgroups and interactions                                                                                                                                                                                                                                                                                                                                                                                                    | 6                  |
|                           |        | (c) Explain how missing data were addressed                                                                                                                                                                                                                                                                                                                                                                                                                            | 6                  |
|                           |        | (d) <i>Cohort study</i> —If applicable, explain how loss to follow-up was addressed<br><i>Case-control study</i> —If applicable, explain how matching of cases and controls was addressed                                                                                                                                                                                                                                                                              |                    |

|                          |     |                                                                                                                                                                                                              |        |
|--------------------------|-----|--------------------------------------------------------------------------------------------------------------------------------------------------------------------------------------------------------------|--------|
|                          |     | <i>Cross-sectional study</i> —If applicable, describe analytical methods taking account of sampling strategy                                                                                                 |        |
|                          |     | (e) Describe any sensitivity analyses                                                                                                                                                                        |        |
| <b>Results</b>           |     |                                                                                                                                                                                                              |        |
| Participants             | 13* | (a) Report numbers of individuals at each stage of study—eg numbers potentially eligible, examined for eligibility, confirmed eligible, included in the study, completing follow-up, and analysed            | 6      |
|                          |     | (b) Give reasons for non-participation at each stage                                                                                                                                                         | 6      |
|                          |     | (c) Consider use of a flow diagram                                                                                                                                                                           |        |
| Descriptive data         | 14* | (a) Give characteristics of study participants (eg demographic, clinical, social) and information on exposures and potential confounders                                                                     | 6/7    |
|                          |     | (b) Indicate number of participants with missing data for each variable of interest                                                                                                                          | 7      |
|                          |     | (c) <i>Cohort study</i> —Summarise follow-up time (eg, average and total amount)                                                                                                                             | 6      |
| Outcome data             | 15* | <i>Cohort study</i> —Report numbers of outcome events or summary measures over time                                                                                                                          | 7      |
|                          |     | <i>Case-control study</i> —Report numbers in each exposure category, or summary measures of exposure                                                                                                         |        |
|                          |     | <i>Cross-sectional study</i> —Report numbers of outcome events or summary measures                                                                                                                           |        |
| Main results             | 16  | (a) Give unadjusted estimates and, if applicable, confounder-adjusted estimates and their precision (eg, 95% confidence interval). Make clear which confounders were adjusted for and why they were included | 7/8    |
|                          |     | (b) Report category boundaries when continuous variables were categorized                                                                                                                                    |        |
|                          |     | (c) If relevant, consider translating estimates of relative risk into absolute risk for a meaningful time period                                                                                             |        |
| Other analyses           | 17  | Report other analyses done—eg analyses of subgroups and interactions, and sensitivity analyses                                                                                                               | 7/8    |
| <b>Discussion</b>        |     |                                                                                                                                                                                                              |        |
| Key results              | 18  | Summarise key results with reference to study objectives                                                                                                                                                     | 8      |
| Limitations              | 19  | Discuss limitations of the study, taking into account sources of potential bias or imprecision. Discuss both direction and magnitude of any potential bias                                                   | 11     |
| Interpretation           | 20  | Give a cautious overall interpretation of results considering objectives, limitations, multiplicity of analyses, results from similar studies, and other relevant evidence                                   | 8/9/10 |
| Generalisability         | 21  | Discuss the generalisability (external validity) of the study results                                                                                                                                        | 11     |
| <b>Other information</b> |     |                                                                                                                                                                                                              |        |
| Funding                  | 22  | Give the source of funding and the role of the funders for the present study and, if applicable, for the original study on which the present article is based                                                | 12     |

\*Give information separately for cases and controls in case-control studies and, if applicable, for exposed and unexposed groups in cohort and cross-sectional studies.

**Note:** An Explanation and Elaboration article discusses each checklist item and gives methodological background and published examples of transparent reporting. The STROBE checklist is best used in conjunction with this article (freely available on the Web sites of PLoS Medicine at <http://www.plosmedicine.org/>, Annals of Internal Medicine at <http://www.annals.org/>, and Epidemiology at <http://www.epidem.com/>). Information on the STROBE Initiative is available at [www.strobe-statement.org](http://www.strobe-statement.org).



# BMJ Open

## Risk assessment of patient factors and medications for drug-related problems from a prospective longitudinal study of newborns admitted to a neonatal intensive care unit

|                                 |                                                                                                                                                                                                                                                                                                                                                                                                                                                                                                   |
|---------------------------------|---------------------------------------------------------------------------------------------------------------------------------------------------------------------------------------------------------------------------------------------------------------------------------------------------------------------------------------------------------------------------------------------------------------------------------------------------------------------------------------------------|
| Journal:                        | <i>BMJ Open</i>                                                                                                                                                                                                                                                                                                                                                                                                                                                                                   |
| Manuscript ID                   | bmjopen-2018-024377.R1                                                                                                                                                                                                                                                                                                                                                                                                                                                                            |
| Article Type:                   | Research                                                                                                                                                                                                                                                                                                                                                                                                                                                                                          |
| Date Submitted by the Author:   | 07-Dec-2018                                                                                                                                                                                                                                                                                                                                                                                                                                                                                       |
| Complete List of Authors:       | Leopoldino, Ramon; Universidade Federal do Rio Grande do Norte Centro de Ciencias da Saude, Pharmacy<br>Santos, Marco; Maternidade Escola Januário Cicco<br>Costa, Tatiana; Universidade Federal do Rio Grande do Norte Maternidade Escola Januário Cicco<br>Martins, Rand; Universidade Federal do Rio Grande do Norte Centro de Ciencias da Saude, Department of Pharmacy<br>Oliveira, António; Universidade Federal do Rio Grande do Norte Centro de Ciencias da Saude, Department of Pharmacy |
| <b>Primary Subject Heading</b>: | Paediatrics                                                                                                                                                                                                                                                                                                                                                                                                                                                                                       |
| Secondary Subject Heading:      | Intensive care, Pharmacology and therapeutics                                                                                                                                                                                                                                                                                                                                                                                                                                                     |
| Keywords:                       | Neonatal intensive & critical care < INTENSIVE & CRITICAL CARE, Health & safety < HEALTH SERVICES ADMINISTRATION & MANAGEMENT, Adverse events < THERAPEUTICS                                                                                                                                                                                                                                                                                                                                      |
|                                 |                                                                                                                                                                                                                                                                                                                                                                                                                                                                                                   |

SCHOLARONE™  
Manuscripts

1  
2  
3 **Title:** Risk assessment of patient factors and medications for drug-related problems from a  
4  
5 prospective longitudinal study of newborns admitted to a neonatal intensive care unit  
6

7 **Running title:** Drug-related problems in neonatal care  
8  
9

10  
11  
12 **Authors:** Ramon D. Leopoldino<sup>1</sup>, Marco T. Santos<sup>2</sup>, Tatiana X. Costa<sup>2</sup>, Rand R. Martins<sup>1</sup>,  
13  
14 António G. Oliveira<sup>1</sup>  
15  
16

17  
18  
19 **Affiliation of authors:**  
20

21 1. Department of Pharmacy, Centro de Ciências da Saúde, Universidade Federal do Rio Grande  
22  
23 do Norte, Natal, Brazil.  
24

25  
26 2. Maternity School Januário Cicco, Universidade Federal do Rio Grande do Norte, Natal,  
27  
28 Brazil.  
29

30  
31  
32  
33 **Correspondence to:** Mr Ramon D. Leopoldino, PharmD; ramon.weyler@gmail.com.  
34  
35

36  
37 **Key words:** Neonatal intensive & critical care; Health & safety; Adverse events  
38  
39

40  
41  
42 **Abstract:** 262 words  
43

44 **Text:** 3,178 words  
45

46 **Tables and Figures:** 4  
47  
48  
49  
50  
51  
52  
53  
54  
55  
56  
57  
58  
59  
60

## ABSTRACT

**Objective:** To identify patient factors and medications associated with the occurrence of Drug Related Problems (DRP) in neonates admitted to Neonatal Intensive Care Units (NICU).

**Design:** Prospective longitudinal study.

**Setting:** NICU of a teaching hospital in Brazil.

**Participants:** The data were collected from the records of the clinical pharmacy service of all neonates admitted between April 2014 and January 2017, excluding neonates with length of stay in the NICU < 24 hours or without prescribed drugs.

**Primary outcome measures:** The occurrence of one or more DRP (conditions interfering in the patient's pharmacotherapy with potential undesired clinical outcomes).

**Results:** The study observed 600 neonates who had a median length of stay in the NICU of 13 days (range 2 to 278 days). DRP were identified in most neonates (60.5%). In a multivariate logistic regression model, the factors independently associated with DRP were gestational age (adjusted odds-ratio (AOR) 0.85, 95% confidence interval (CI) 0.81–0.89), 5-minute APGAR < 7 (AOR 1.74, 95% CI 1.00–3.13), neurological disease (AOR 2.49, 95%CI 1.09–5.69), renal disease (AOR 5.75, 95%CI 1.85–17.8) and cardiac disease (AOR 2.36, 95%CI 1.31–4.24). The medications with greater risk for DRP were amphotericin B (AOR 4.80), meropenem (AOR 4.09), alprostadil (AOR 3.38), vancomycin (AOR 3.34), ciprofloxacin (AOR 3.03), gentamicin (AOR 2.43), cefepime (AOR 1.88), amikacin (AOR 1.82) and omeprazole (AOR 1.66). These medicines represent one-third of all prescribed drugs.

**Conclusions:** Gestational age, 5-minute APGAR < 7 and neurological, cardiac and renal disease are risk factors for DRP in NICUs. Alprostadil, omeprazole and several anti-infectives were associated with greater risk of DRP.

## STRENGTHS AND LIMITATIONS OF THIS STUDY

- This is the first study identifying patient variables and drugs associated with the occurrence of Drug-related problems (DRP), exclusively in Neonatal Intensive Care Unit (NICU) patients.
- The validity of the results is strengthened by the large cohort size, the prospective data collection, the longitudinal design, the in-situ evaluation of DRP and the adoption of a well-known DRP classification system.
- However, the data were obtained from a single institution, which may somehow impair the generalization of our findings.
- It is also possible that administration errors have been under-estimated by recording failures.

## INTRODUCTION

The Intensive Care Unit (ICU) is a complex environment, characterized by polypharmacy, transfusions and frequent surgical procedures.<sup>1</sup> Neonatal Intensive Care Units (NICU) may pose additional hazards to patient safety because of the frequent usage of off-label and unlicensed medicines and of decimal dilutions of intravenous medicines.<sup>2,3</sup> In addition, because of their physiological immaturity and rapid growth, neonates exhibit large interindividual variability in drug metabolism and excretion.<sup>2</sup> Such characteristics may predispose neonates to drug-related problems (DRP).

DRP are events or circumstances that, actually or potentially, interfere in the patient's pharmacotherapy and that may lead to undesired clinical outcomes.<sup>4</sup> Those events include errors in the drug therapy processes (prescription, dispensation and administration) and adverse drug events (any untoward event related to medication that results in harm to the patient).<sup>5-7</sup>

In paediatric wards, DRP occur in about half of the patients and most of these are preventable.<sup>8</sup> However, there is very little information on DRP in children in intensive care units, especially among neonates.

It is believed that DRP are particularly frequent and serious in neonates.<sup>9, 10</sup> Neonates are very sensitive to dose variations because of their particular pharmacokinetics and pharmacodynamics, consequence of the lower drug metabolism and clearance, low levels of plasma proteins, high proportion of body water and level of receptor expression and sensitivity.<sup>11, 12</sup> Some authors have shown that harm involving medicines is common in NICUs, with incidence rates ranging from 10 to 20 cases per 1,000 patient-days.<sup>13, 14</sup> Such harm can lead to prolonged hospitalization time and, in extreme cases, to the death of patients. It also generates an increase in hospital costs.<sup>13, 15</sup> Thus, the development of effective preventive strategies directed to DRP is of great relevance for the improvement of health care and one step towards this goal is the identification of patients susceptible to DRP.<sup>16</sup>

1  
2  
3 Therefore, the purpose of this study was to identify risk factors for the occurrence of  
4 one or more DRP in NICU, to assess the risk associated with commonly used medications and  
5 to describe the causes of DRP in the medications with greater risk of DRP in neonates.  
6  
7  
8  
9  
10  
11

## 12 **METHODS**

13  
14 This was an observational, prospective, longitudinal study conducted from April 2014  
15 to January 2017 in the 20-bed NICU of a teaching maternity hospital specialized in high-risk  
16 pregnancy. All neonates admitted to the NICU during the study period were prospectively  
17 evaluated for inclusion in the study. Inclusion criteria were a NICU stay longer than 24 hours  
18 and at least one prescribed drug. Neonates who were prescribed exclusively with electrolytes,  
19 parenteral nutrition, blood products, oxygen therapy, diagnostic agents, and vitamin and  
20 mineral supplements were excluded from the study, as those products were not considered as  
21 drugs.  
22  
23  
24  
25  
26  
27  
28  
29  
30  
31  
32

33 In the absence of information in the literature on risk factors for DRP in neonates, the patient  
34 variables selected as candidates for assessment in a multivariate risk model were those that could be  
35 collected at NICU admission on every neonate and that reflect serious conditions that are usually  
36 associated with enhanced pharmacotherapy. The data collected from each neonate included sex,  
37 gestational age, birth weight, type of delivery (vaginal or caesarean), occurrence of premature  
38 rupture of membranes (PROM), 1-minute and 5-minute APGAR, a diagnosis of neurological,  
39 renal or cardiac disorder, and malformations. The APGAR is a score that evaluates the birth  
40 condition of newborns in the first and fifth minutes of life, values below seven being considered  
41 an ominous sign.<sup>17</sup> In addition to those risk factors that may be predictors of DRP, patient  
42 variables representing the complexity of care (number of unique medications prescribed,  
43 number of different clinical problems, and NICU length of stay in days) were also collected  
44 from each patient.  
45  
46  
47  
48  
49  
50  
51  
52  
53  
54  
55  
56  
57  
58  
59  
60

1  
2  
3 The study also wanted to identify medications that were associated with increased risk  
4 of DRP in neonates and, therefore, all the medications prescribed to each neonate during the  
5 NICU stay were recorded.  
6  
7  
8  
9

10 The identification of DRP was actively performed on a daily basis by the NICU clinical  
11 pharmacy team (a chief pharmacist and four assistant pharmacists) through the analysis of  
12 medical charts, medication orders and nursing records, seeking entries that might indicate the  
13 occurrence of a DRP. The pharmacists involved in this research were permanent members of the  
14 clinical pharmacy team allocated to the NICU of our institution. The identification of DRP and their  
15 notification to the medical team is an important part of their routine work and all were experienced in  
16 the detection of DRP. For each identified DRP, its causes were then classified according to the  
17 Pharmaceutical Care Network Europe system v.6.2<sup>4</sup> (see supplementary file 1). This  
18 classification was carried out independently by two pharmacists (RDL and MTS), supported by  
19 the Neofax® textbook (Thomson Reuters, New York, USA), as well as the Micromedex®  
20 (Truven Health Analytics, Michigan, USA) and Uptodate® (WoltersKluwer, Alphenaan  
21 den Rijn, NL) databases that provided authoritative information on adverse drug reaction and drug-  
22 drug interactions. Whenever the two evaluators disagreed upon the classification of the cause  
23 of a DRP, a third pharmacist (TXC) was called in to break the tie.  
24  
25  
26  
27  
28  
29  
30  
31  
32  
33  
34  
35  
36  
37  
38  
39  
40  
41  
42  
43

#### 44 **Statistical analysis**

45  
46 The target sample size was set at 600 patients, a number that would afford 70% power to  
47 identify associations with an odds-ratio of 1.30 or greater for patient factors with a prevalence  
48 over 30%<sup>18</sup>. All variables are described by mean±standard deviation, median (range), or as  
49 absolute and relative frequency, as appropriate. For the identification of risk factors of DRP, an  
50 initial selection of patient variables at NICU admission were tested for association with the  
51 occurrence of one or more DRP with logistic regression. All variables were binary, except  
52 gestational age and birth weight that were continuous. The set of patient variables whose  
53  
54  
55  
56  
57  
58  
59  
60

1  
2  
3 association with DRP was statistically significant at the 0.10 significance level in univariate  
4  
5 logistic regression was analysed by stepwise backward multiple logistic regression, and those  
6  
7 variables significant at the 0.05 level were retained in the final model. Variables collected only  
8  
9 at discharge from the NICU were analysed in a separate model. Results of these analyses are  
10  
11 presented as odds-ratios adjusted by the other variables in the model (AOR) and 95%  
12  
13 confidence intervals (CI). The model was  $\ln[p(\text{DRP}=1)/p(\text{DRP}=0)] = \beta_0 + \beta_i x_i$ , where  $\beta_0$  is the  
14  
15 regression constant,  $\beta_i$  the partial regression coefficients and  $x_i$  the independent variables.  
16  
17

18  
19 It was hypothesized that some medications could be singled out because they are  
20  
21 associated with a significantly higher risk of DRP, through a combination of complex dosing  
22  
23 and/or administration, and of frequency of use. Those drugs would be high-risk medications  
24  
25 requiring close monitoring from the clinical pharmacy team. In the NICU setting, very often  
26  
27 several medications are prescribed concurrently, sometimes by simultaneously through the  
28  
29 same intravenous line, and accounting for the interplay of all medications administered to a  
30  
31 patient at a given in a statistical model would be unmanageable. Therefore, the estimation of  
32  
33 the risk of DRP associated with each medication was based on a simpler model, where the risk  
34  
35 of DRP observed with a given medication was compared to the average risk observed with all  
36  
37 other medications prescribed to this patient population, controlling for the risk factors for DRP  
38  
39 identified in the previous analysis. For this analysis, a set of multiple logistic regressions with  
40  
41 each drug as independent variable and adjusted by the risk factors identified in the previous  
42  
43 analysis was evaluated and, for those medications where a statistically significant association  
44  
45 with the occurrence of one or more DRP was found at the 5% significance level, results are  
46  
47 presented as adjusted odds-ratios of DRP with that medication to the average risk of all the  
48  
49 other medications prescribed. The model was  $\ln[p(\text{DRP}=1)/p(\text{DRP}=0)] = \beta_0 + \beta_1 x_1 + \beta_i x_i$ , where  
50  
51  $\beta_0$  is the regression constant,  $\beta$  are the partial regression coefficients,  $x_1$  a binary variable coding  
52  
53 for the medication, and  $x_i$  the co-variables. In the drugs identified in the previous analysis as  
54  
55  
56  
57  
58  
59  
60



high-risk medications, the respective causes of DRP are presented descriptively. The interaction of each of those high-risk medications with each risk factor previously identified was tested with multiple logistic regression, with significant interactions assumed at the  $p < 0.10$  level. The model was  $\ln[p(\text{DRP}=1)/p(\text{DRP}=0)] = \beta_0 + \beta_1 x_1 + \beta_i x_i + \beta_j x_1 x_i$ , where  $\beta_0$  is the regression constant,  $\beta$  are the partial regression coefficients,  $x_1$  a binary variable coding for the medication,  $x_i$  the co-variables and  $\beta_j x_1 x_i$  the interaction of the medication with each co-variable. Statistical analysis was performed with Stata 11 (Stata Corporation, College Station, TX, USA).

### Patient and Public Involvement

Patients were not involved in the study.

### RESULTS

During the 34-month study period, a total of 627 newborns were admitted to the NICU. Of these, 15 newborns were excluded (13 because they had no drugs prescribed and two patients in whom the length of stay was less than 24 hours). Six hundred twelve newborns remained eligible but 12 (1.96%) were excluded from the analysis because they had missing pharmacotherapy follow-up data. The analysis set of 600 newborns was observed for a total of 15,836 NICU days, with a median of 13 days (range 2 – 278 days). The study population consisted of 265 females (45.1%) and the mean gestational age was  $32.1 \pm 4.1$  weeks. On average,  $8.2 \pm 6.0$  medicines were prescribed to each newborn during the NICU stay. A total of 1,115 DRP were identified, with a mean of  $1.9 \pm 2.6$  DRP per patient. There were 237 (39.5%) patients with no DRP, 132 (22.0%) with one DRP, 71 (11.8%) with two DRP, and 160 (26.7%) with three or more DRP. Multiple DRP in the same patient could occur concurrently or simultaneously. Sixty-eight neonates (11.3%) died during the study (Table 1).

1  
2  
3 As shown in Table 2, univariate logistic regression analysis identified eight patient  
4 variables at admission that were associated with DRP: lower gestational age, lower birth weight,  
5 vaginal delivery, 1-minute and 5-minute APGAR < 7, neurological disorder, renal disorder, and  
6 cardiovascular disorder. In the multivariate logistic regression model, five remained significant:  
7 lower gestational age (adjusted odds-ratio (AOR) 0.85), 5-minute APGAR <7 (AOR 1.74),  
8 neurological disorder (AOR 2.49), renal disorder (AOR 5.75) and cardiac disorder (AOR 2.36)  
9 were risk factors at admission for DRP. The *c*-statistic for the multivariate model with five  
10 variables was 0.72.  
11  
12  
13  
14  
15  
16  
17  
18  
19  
20

21 DRP were associated with increased length of stay (38.2±39.6 days vs. 10.8±9.9 days,  
22 AOR 1.04, *p*<0.001), number of prescribed drugs (10.6±6.3 vs. 4.6±3.0, AOR 1.22, *p*<0.001)  
23 and number of clinical problems (5.57±2.86 vs. 3.39±1.51, AOR 1.22, *p*<0.001). There was no  
24 evidence of an association with a fatal outcome (11.4% vs. 11.3%, *p*=0.702).  
25  
26  
27  
28  
29

30 Table 3 shows the medicines with a statistically significant increased risk of DRP  
31 compared to all the other prescribed medicines, adjusted for gestational age, 5-minute APGAR  
32 score <7, neurological disorder, renal disorder and cardiac disorder, could be obtained. The  
33 medications, and corresponding adjusted odds-ratios, were amphotericin B (AOR 4.80),  
34 meropenem (AOR 4.09), alprostadil (AOR 3.38), vancomycin (AOR 3.34), ciprofloxacin  
35 (AOR 3.03), gentamicin (AOR 2.43), cefepime (AOR 1.88), amikacin (AOR 1.82) and  
36 omeprazole (AOR 1.66). Related to increase in the occurrence of DRP, there were statistically  
37 significant interactions between renal disease and the prescription of amphotericin (*p*=0.084)  
38 and of meropenem (*p*=0.054), and between a 5-minute APGAR score < 7 and prescription of  
39 vancomycin (*p*=0.038).  
40  
41  
42  
43  
44  
45  
46  
47  
48  
49  
50  
51  
52  
53

54 The frequency of prescription, and the prevalence of DRP related to those medications  
55 are also displayed in Table 3. These nine drugs represent 28.4% (1,395/4,917) of all medications  
56 prescribed in the NICU and accounted for 49.6% (622/1,252) of DRP involving medications.  
57  
58  
59  
60

1  
2  
3 The most prescribed medicines in the group were gentamicin (10.5%, 518) and meropenem  
4 (3.1%, 152), and these drugs were also the most often involved in DRP (16.9%, 211 and 8.0%,  
5  
6  
7  
8  
9 100 respectively).

10 As for the causes of DRP involving the nine medicines (Table 4), dose selection was the  
11 most common cause for gentamicin (62.6%), amikacin (64.4%), meropenem (38.0%), cefepime  
12 (42.1%) and ciprofloxacin (30.77%). DRP involving omeprazole (53.57%), amphotericin B  
13 (45.7%) were most often related to drug use process. Alprostadil was mainly involved in others  
14 causes as wrong drug preparation technique (18.75%) and suspected adverse reaction (31.25%).  
15  
16  
17  
18  
19  
20  
21  
22  
23  
24  
25  
26  
27  
28  
29  
30  
31  
32  
33  
34  
35  
36  
37  
38  
39  
40  
41  
42  
43  
44  
45  
46  
47  
48  
49  
50  
51  
52  
53  
54  
55  
56  
57  
58  
59  
60  
Vancomycin was most often implicated in errors of prescription logistics (41.24%).

## DISCUSSION

26  
27  
28  
29  
30  
31  
32  
33  
34  
35  
36  
37  
38  
39  
40  
41  
42  
43  
44  
45  
46  
47  
48  
49  
50  
51  
52  
53  
54  
55  
56  
57  
58  
59  
60  
In our study, we observed that neonates with low gestational age, low 5-minute APGAR, neurological disorder, renal disorder and cardiac disorder are more likely to have DRP during their stay in NICU. An assessment of the risk of DRP was made for alprostadil, amikacin, amphotericin B, cefepime, ciprofloxacin, gentamicin, meropenem, omeprazole and vancomycin. Such medicines accounted for less than one-third of the drugs prescribed in the NICU, and were involved in half of DRP, the majority being related to drug dose and to drug use.

Only a few studies have identified risk factors for the occurrence of DRP in hospitalized patients. Most of those studies were conducted in adult and pediatric wards for periods under six months and enrolled fewer than 400 patients.<sup>19 – 22</sup> We performed a study in the NICU involving 600 neonates for a period of three years and presenting a set of different predictor variables. Comparisons to the results of other studies are therefore difficult. Even so, several risk factors related to DRP identified in our study, such as age and clinical problems (cardiac,

1  
2  
3 neurological and renal disorders), were also observed in the works of Urbina et al.<sup>16</sup>, Peterson  
4 et al.<sup>21</sup> and Blix et al.<sup>23</sup> although those studies were conducted in adult patients.

7 We also found that a low 5-minute APGAR was associated with a higher risk of DRP.  
8  
9 This predictor is a specific neonatology parameter that measures the condition of the newborn  
10 at birth.<sup>24</sup> A low APGAR score usually represents a serious situation with the corresponding  
11 need for several therapeutic interventions which, in turn, increase the risk of DRP.  
12  
13  
14  
15

16 The detection of the clinical variables associated with DRP, as well as knowledge of the  
17 risk of DRP associated with each medication, represents a first step for the development of  
18 preventive strategies for enhanced patient safety and improvements in the process of care. Blix  
19 et al.<sup>23</sup> were the first authors to present risk estimates for drugs, while other papers<sup>8, 19 – 22, 25, 26</sup>  
20 have only described drugs involved in DRP. We were able to quantify the risk of DRP for a set  
21 of drugs that are involved in half of all DRP, namely alprostadil, omeprazole and several  
22 antimicrobials (amikacin, cefepime, ciprofloxacin, gentamicin, meropenem, amphotericin B  
23 and vancomycin). Pawluk et al.<sup>25</sup> e Stavroudis et al.<sup>26</sup> claimed that the risk of DRP associated  
24 with a medicine is directly related to the frequency of prescription. However, our results show  
25 that the medicines with greater odds of DRP (vancomycin and amphotericin B) were not the  
26 most prescribed. These results suggest that the risk of DRP is primarily associated with the  
27 chemical and pharmacological properties of a drug, therefore strongly related to the level of  
28 difficulty on setting the appropriate dose and on the drug's potential for adverse reactions,  
29 interactions and incompatibilities.  
30  
31  
32  
33  
34  
35  
36  
37  
38  
39  
40  
41  
42  
43  
44  
45  
46  
47

48 Inappropriate dose selection was the most common cause of DRP for aminoglycosides,  
49 cefepime and meropenem. In neonates, the adjustment of dose and regimen of antibiotics is  
50 extremely complex, the main reason for this being the rapid change in weight during the first  
51 days of life, as well as significant heterogeneity in the maturation of organs and systems across  
52 newborns.<sup>12, 27</sup> The lower than the recommended doses of those medicines administered in this  
53  
54  
55  
56  
57  
58  
59  
60

1  
2  
3 study were often due to a delay in the adjustment of the medication dose to the rapid weight  
4 gain of the neonate.  
5  
6

7 We observed that amphotericin B, ciprofloxacin and omeprazole were associated with  
8 inappropriate process of drug use, specifically with drug administration error, with drug  
9 incompatibility being the most frequent cause. Neonates have a high risk of exposure to drug  
10 incompatibilities because of the limited number of intravenous accesses, often leading to  
11 simultaneous administration of incompatible drugs through the same intravenous line. In  
12 addition, the requirements for delivery of drugs in this population, such as dilutions and reduced  
13 infusion rates, can lead to incompatibilities because of high concentrations and longer time of  
14 contact between incompatible medicines.<sup>28</sup> Such problems may be implicated in therapeutic  
15 failures due to drug degradation and even to thromboembolic complications, including cases of  
16 deaths, due to the precipitate formed reaching the bloodstream.<sup>29–31</sup>  
17  
18  
19  
20  
21  
22  
23  
24  
25  
26  
27  
28  
29

30 Another medicine that had potential incompatibilities as the main cause of DRP was  
31 alprostadil. However, this medicine stands out for the significant percentage of cases of  
32 suspected adverse reactions. Fever, leukocytosis, dyspnea are reactions commonly observed in  
33 the neonate soon after the administration of alprostadil.<sup>32</sup> Because of these reactions and  
34 complications, this medication is for intensive therapy only.  
35  
36  
37  
38  
39  
40  
41

42 The most common cause of vancomycin-related problems was errors of prescription  
43 logistics. These errors are characterized by the lack of important information in the prescription  
44 for the safe administration of the medications, or by the non-justifiable prescription of non-  
45 standard medicines in the institution. The lack of information on the time length of the infusion  
46 on the prescription was the most common error involving vancomycin, an important problem  
47 because rapid infusions in less than 60 minutes can lead to macular or maculopapular skin  
48 rashes (red man syndrome).<sup>33</sup>  
49  
50  
51  
52  
53  
54  
55  
56  
57  
58  
59  
60

1  
2  
3 This study has some limitations. The data were obtained from a single institution, which  
4 may somehow impair the generalization of our findings. Furthermore, as DRP were identified  
5 from patient records and medical reports, it is possible that administration errors have been  
6 under-estimated by recording failures. However, the same methodology has been adopted by  
7 other studies in DRP and, considering the scarcity of papers related to the topic of risk factors  
8 for DRP in NICU patients, we believe that our results are relevant. The large cohort size, the  
9 prospective data collection, the longitudinal design, the in-situ evaluation of DRP and the  
10 adoption of a well-known DRP classification system are methodological features that contribute  
11 to the validity of our results. To our knowledge, this is the first study identifying patient  
12 variables and drugs associated with the occurrence of DRP, exclusively in NICU patients. The  
13 detection of those predictors is of great value for the identification of patients more prone to  
14 DRP and, therefore, for the development of screening tools. Such tools can support the work of  
15 the healthcare team, especially the clinical pharmacist, with the strengthening of preventive  
16 strategies and the optimization of resources and time.  
17  
18  
19  
20  
21  
22  
23  
24  
25  
26  
27  
28  
29  
30  
31  
32  
33  
34

35 Further research is needed in order to deepen the study of factors associated with DRP,  
36 aiming at the elaboration of risk stratification tools. Future studies should also analyse the  
37 influence of external factors on the incidence of DRP, which have not been addressed in our  
38 study, such as the number and characteristics of the NICU team members, the workplace  
39 conditions, the intra-team and inter-team communication, and the organization of the hospital.  
40 Another issue of considerable importance would be the investigation of clinical outcomes of  
41 DRP in NICUs.  
42  
43  
44  
45  
46  
47  
48  
49  
50  
51  
52

## 53 CONCLUSION

54  
55  
56 In conclusion, low gestational age, low 5-minute APGAR, neurological disorder, renal  
57 disorder and cardiac disorder are risk factors associated with the occurrence of DRP. We also  
58  
59  
60

1  
2  
3 list nine medications with a risk for DRP above the average risk of other medications:  
4  
5 alprostadil, amikacin, amphotericin B, cefepime, ciprofloxacin, gentamicin, meropenem,  
6  
7 omeprazole and vancomycin. Although they are the most involved in DRP, these medicines  
8  
9 account for less than one-third of the drugs prescribed in NICU. Inappropriate dose selection  
10  
11 and inappropriate drug use (mainly potential drug incompatibilities) were the main causes of  
12  
13 DRP related to those medicines.  
14  
15  
16  
17  
18

19 **Acknowledgements** We are grateful to all pharmacists of the maternity hospital, especially to  
20  
21 the pharmacists Dr. Elaine Alves and Dr. Tayne Cortez for contributing to the elaboration of  
22  
23 the research project, the pharmacy residents Kadine Pontes and Bruna Nunes for making  
24  
25 available the records of pharmacotherapeutic follow-up of patients, and pharmacy students  
26  
27 Mayara Alves and Amanda Nascimento for helping in data collection and tabulation. We also  
28  
29 thank all members of the NICU, physicians, physiotherapists, nurses and auxiliaries.  
30  
31  
32

33 **Contributions** RDL participated in all stages of the study. MTS and TXC participated in the  
34  
35 study design and revision of the manuscript. RRM and AGO contributed to the design and  
36  
37 analysis of the study and the writing and revision of the manuscript. All authors approved the  
38  
39 final version of the manuscript.  
40  
41

42 **Funding** This study received fund from the National Council of Technological and Scientific  
43  
44 Development (CNPq).  
45  
46

47 **Competing interests** None declared.  
48

49 **Patient consent** Not required.  
50

51 **Ethics approval** This study was approved by the Institutional Review Board of the University  
52  
53 Hospital Onofre Lopes (No. 580.201/2014), who waived the need for written informed consent  
54  
55 because the study only evaluated data collected from clinical pharmacy records.  
56  
57

58 **Provenance and peer review** Not commissioned; externally peer reviewed.  
59  
60

**Data sharing statement** All data relevant to the study are included in the article or uploaded as supplementary information.

## REFERENCES

1. Raju TNK, Suresh G, Higgins RD. Patient Safety in the Context of Neonatal Intensive Care: Research and Educational Opportunities. *Pediatr Res* 2011;70:109–15.
2. Sorrentino E, Alegiani C. Medication errors in the neonate. *J Matern Fetal Neonatal Med* 2012; 25:83–5.
3. Chappell K, Newman C. Potential tenfold drug overdoses on a neonatal unit. *Arch Dis Child Fetal Neonatal Ed* 2004;89:F483–F484.
4. Pharmaceutical Care Network Europe (PCNE). The PCNE Classification V 6.2. 2010 [http://www.pcne.org/upload/files/11\\_PCNE\\_classification\\_V6-2.pdf/](http://www.pcne.org/upload/files/11_PCNE_classification_V6-2.pdf/) (accessed 15 April 2018).
5. Bates DW, Cullen DJ, Laird N, et al. Incidence of adverse drug events and potential adverse drug events: implication for prevention. *JAMA* 1995;274:29–34.
6. Kaushal R, Bates DW, Landrigan C, et al. Medication errors and adverse drug events in pediatric inpatients. *JAMA* 2001;285:2114–20.
7. van den Bemt PMLA, Egberts TCG, de Jong-van den Berg LTW, Brouwers JRBJ. Drug-related problems in hospitalised patients. *Drug Saf* 2000; 22:321–33.
8. Rashed AN, Neubert A, Tomlin S, Jackman J, Alhamdan H, AlShaikh A, et al. Epidemiology and potential associated risk factors of drug-related problems in hospitalised children in the United Kingdom and Saudi Arabia. *Eur J Clin Pharmacol* 2012;68:1657–66.
9. Allegaert K, van den Anker JN. Adverse drug reactions in neonates and infants: a population-tailored approach is needed. *Br J Clin Pharmacol* 2015;80:788–95.



10. Fernandez-Llamazares CM, Calleja-Hernández M-Á, Manrique-Rodríguez S, Pérez-Sanz C, Durán-García E, Sanjurjo-Sáez M. Prescribing errors intercepted by clinical pharmacists in paediatrics and obstetrics in a tertiary hospital in Spain. *Eur J Clin Pharmacol* 2012;68:1339–45.
11. van den Anker JN. How to optimize the evaluation and use of antibiotics in neonates. *Early Hum Dev* 2014; 90:10S–12S.
12. Rodieux F, Wilboux M, van den Anker JN, Pfister M. Effect of Kidney Function on Drug Kinetics and Dosing in Neonates, Infants, and Children. *Clin Pharmacokinet.* 2015;54:1183–204.
13. Kunac DI, Kennedy J, Austin N, Reith D. Incidence, preventability, and impact of Adverse Drug Events (ADEs) and potential ADEs in hospitalized children in New Zealand: a prospective observational cohort study. *Paediatr Drugs* 2009; 11:153–60.
14. Sakuma M, Ida H, Nakamura T, Ohta Y, Yamamoto K, Seki S, et al. Adverse drug events and medication errors in Japanese paediatric inpatients: a retrospective cohort study. *BMJ Qual Saf* 2014;23:830–7.
15. Ohta Y, Sakuma M, Koike K, Bates DW, Morimoto T. Influence of adverse drug events on morbidity and mortality in intensive care units: the JADE study. *Int J Qual Health Care* 2014;26:573–8.
16. Urbina O, Ferrández O, Grau S, et al. Design of a score to identify hospitalized patients at risk of drug-related problems. *Pharmacoepidemiol Drug Saf* 2014;23: 923–32.
17. Apgar V. A proposal for a new method of evaluation of the newborn infant. *Curr Res Anesth Analg* 1953;32:260–7.
18. Chow S, Shao J, Wang H. Sample Size Calculations in Clinical Research. 2nd Ed. Boca Raton, FL: Chapman & Hall/CRC Biostatistics Series 2008.

- 1  
2  
3 19. Birarra MK, Heye TB, Shibeshi W. Assessment of drug-related problems in pediatric ward  
4 of Zewditu Memorial Referral Hospital, Addis Ababa, Ethiopia. *Int J Clin Pharm* 2017;39:1–8.  
5  
6  
7 20. Khmour MR, Jarab AS, Adas HO, Samaro EZ, Mukattash TL, Hallak HO. Identification of  
8 drug-related problems: a prospective study in two general hospitals. *Curr Clin Pharmacol*  
9 2012;7:276–81.  
10  
11  
12 21. Peterson C, Gustafsson M. Characterisation of drug-related problems and associated factors  
13 at a clinical pharmacist service-naïve Hospital in Northern Sweden. *Drugs Real World*  
14 *Outcomes* 2017;4:97–107.  
15  
16  
17 22. Rashed AN, Wilton L, Lo CCH, Kwong BYS, Leung S, Wong ICK. Epidemiology and  
18 potential risk factors of drug-related problems in Hong Kong paediatric wards. *Br J Clin*  
19 *Pharmacol* 2014;77:873–9.  
20  
21  
22 23. Blix HS, Viktil KK, Reikvam A, et al. The majority of hospitalised patients have drug-  
23 related problems: results from a prospective study in general hospitals. *Eur J Clin Pharmacol*  
24 2004;60:651–8.  
25  
26  
27 24. American Academy of Pediatrics, Committee on Fetus and Newborn, American College of  
28 Obstetricians and Gynecologists, Committee on Obstetric Practice. The Apgar Score. *Pediatrics*  
29 2006;117:1444–7.  
30  
31  
32 25. Pawluk S, Jaam M, Hazi F, et al. A description of medication errors reported by pharmacists  
33 in a neonatal intensive care unit. *Int J Clin Pharm* 2017;39:88–94.  
34  
35  
36 26. Stavroudis TA, Shore AD, Morlock L, Hicks RW, Bundy D, Miller MR. NICU medication  
37 errors: identifying a risk profile for medication errors in the neonatal intensive care unit. *J*  
38 *Perinatol* 2010;459–68.  
39  
40  
41 27. Wilbaux M, Fuchs A, Samardzic J, et al. Pharmacometric approaches to personalize use of  
42 primarily renally eliminated antibiotics in preterm and term neonates. *J Clin Pharmacol*  
43 2016;56:909–35.  
44  
45  
46  
47  
48  
49  
50  
51  
52  
53  
54  
55  
56  
57  
58  
59  
60

- 1  
2  
3 28. Sherwin CMT, Medlicott NJ, Reith DM, Broadbent RS. Intravenous drug delivery in  
4 neonates: lessons learnt. *Arch Dis Child* 2014;99:590–4.  
5  
6  
7 29. Bradley JS, Wassel RT, Lee L, Nambiar S. Intravenous ceftriaxone and calcium in the  
8 neonate: assessing the risk for cardiopulmonary adverse events. *Pediatrics* 2009;123:e609 – 13.  
9  
10  
11 30. Kanji S, Lam J, Johanson C, Singh A, Goddard R, Fairbairn J, et al. Systematic review of  
12 physical and chemical compatibility of commonly used medications administered by  
13 continuous infusion in intensive care units. *Crit Care Med* 2010;38:1890–8.  
14  
15  
16 31. Foinard A, Décaudin B, Barthélémy C, Debaene B, Odou P. Impact of physical  
17 incompatibility on drug mass flow rates: example of furosemide-midazolam incompatibility.  
18  
19  
20  
21  
22  
23  
24  
25  
26 32. Lewis AB, Freed MD, Heymann MA, Roehl SL, Kensey RC. Side effects of therapy with  
27 prostaglandin E1 in infants with critical congenital heart disease. *Circulation* 1981;64:893–8.  
28  
29  
30 33. Levy M, Koren G, Dupuis L, Read SE. Vancomycin-induced red man syndrome. *Pediatrics*  
31  
32  
33  
34  
35  
36  
37  
38  
39  
40  
41  
42  
43  
44  
45  
46  
47  
48  
49  
50  
51  
52  
53  
54  
55  
56  
57  
58  
59  
60

Table 1 – Demographic and clinical characteristics of the study population (n = 600)

| Characteristics                   | Value*       |
|-----------------------------------|--------------|
| Gestational age (weeks)           | 32.1±4.1     |
| Female sex                        | 265 (45.1%)  |
| Birth weight (kilograms)          | 1.80±0.88    |
| Length of stay (days)             | 13 (2 – 278) |
| Vaginal delivery                  | 207 (35.2%)  |
| PROM                              | 162 (31.5%)  |
| 1-minute APGAR < 7                | 266 (45.8%)  |
| 5-minute APGAR < 7                | 76 (12.9%)   |
| Number of clinical conditions     | 4.7±2.6      |
| Neurological disorders            | 49 (8.2%)    |
| Renal disorders                   | 52 (8.7%)    |
| Cardiac disorders                 | 107 (17.9%)  |
| Malformations                     | 69 (11.5%)   |
| Number of medications used        | 8.2±6.0      |
| DRP (n=1,115)                     |              |
| Patients with DRP                 | 363 (60.5%)  |
| Average number of DRP per patient | 1.9 ± 2.6    |
| Death                             | 68 (11.3%)   |

\*Values are mean±standard deviation, median (range), or n (%).

PROM, premature rupture of membranes; DRP, drug-related problems.

Table 2– Factors associated with occurrence of drug-related problems in neonatal intensive care

| Variables                      | Univariate analysis |       |       | Multivariate analysis |       |      |      |        |
|--------------------------------|---------------------|-------|-------|-----------------------|-------|------|------|--------|
|                                | OR                  | 95%CI | p     | AOR                   | 95%CI | p    |      |        |
| Collected at patient admission |                     |       |       |                       |       |      |      |        |
| Gestational age in weeks       | 0.87                | 0.83  | 0.91  | <0.001                | 0.85  | 0.81 | 0.89 | 0.003  |
| Female sex                     | 1.32                | 0.94  | 1.84  | 0.105                 |       |      |      |        |
| Birth weight (kilograms)       | 0.55                | 0.46  | 0.68  | <0.001                |       |      |      |        |
| Vaginal delivery               | 1.49                | 1.10  | 2.12  | 0.025                 |       |      |      |        |
| PROM                           | 1.21                | 0.83  | 1.78  | 0.322                 |       |      |      |        |
| 1-minute APGAR <7              | 1.49                | 1.06  | 2.08  | 0.020                 |       |      |      |        |
| 5-minute APGAR <7              | 2.03                | 1.18  | 3.48  | 0.010                 | 1.74  | 1.00 | 3.13 | 0.050  |
| Neurological disorder          | 2.12                | 1.09  | 4.17  | 0.028                 | 2.49  | 1.09 | 5.69 | 0.031  |
| Renal disorder                 | 8.90                | 3.17  | 25.04 | <0.001                | 5.75  | 1.85 | 17.8 | 0.002  |
| Cardiac disorder               | 2.08                | 1.31  | 3.32  | <0.001                | 2.36  | 1.31 | 4.24 | 0.004  |
| Malformations                  | 1.35                | 0.79  | 2.29  | 0.267                 |       |      |      |        |
| Collected at NICU discharge    |                     |       |       |                       |       |      |      |        |
| Number of unique medications   | 1.36                | 1.28  | 1.44  | <0.001                | 1.22  | 1.13 | 1.32 | <0.001 |
| Length of stay in days         | 1.08                | 1.06  | 1.10  | <0.001                | 1.04  | 1.02 | 1.06 | <0.001 |
| Number of clinical problems    | 1.60                | 1.44  | 1.77  | <0.001                | 1.22  | 1.13 | 1.32 | <0.001 |

OR, odds-ratio; CI, confidence interval; AOR, adjusted odds-ratio; PROM, premature rupture of membranes.

Table 3 – Estimates of the risk of drug-related problems (DRP) associated with several drugs administered in NICUs, distributed by cases of DRP and frequency of prescription

| Medicines      | Adjusted Odds-ratio<br>(95%CI)* | Cases of DRP |       | Frequency of prescriptions |       |
|----------------|---------------------------------|--------------|-------|----------------------------|-------|
|                |                                 | n            | %     | n                          | %     |
| Amphotericin B | 4.80 (1.49 – 15.40)             | 46           | 3.7   | 48                         | 1.0   |
| Meropenem      | 4.09 (1.74 – 9.60)              | 100          | 8.0   | 152                        | 3.1   |
| Alprostadil    | 3.38 (1.67 – 6.84)              | 16           | 1.3   | 33                         | 0.7   |
| Vancomycin     | 3.34 (1.17– 9.52)               | 97           | 7.7   | 100                        | 2.0   |
| Ciprofloxacin  | 3.03 (1.34 – 6.85)              | 13           | 1.0   | 24                         | 0.5   |
| Gentamicin     | 2.43 (1.00 – 5.89)              | 211          | 16.9  | 518                        | 10.5  |
| Cefepime       | 1.88 (1.13 – 3.13)              | 38           | 3.0   | 193                        | 3.9   |
| Amikacin       | 1.82 (1.09 – 3.07)              | 73           | 5.8   | 181                        | 3.7   |
| Omeprazole     | 1.66 (1.02 – 2.59)              | 28           | 2.2   | 146                        | 3.0   |
| Total          |                                 | 4,917        | 100,0 | 1,252                      | 100,0 |

\*Odds ratio adjusted for gestational age, 5-minute APGAR <7, neurological disorder, renal disorder and cardiac disorder. The *p*-value for each medicine was < 0.05.

CI, confidence interval.

Table 4 – Type and frequency of the causes of DRP in medicines associated with high-risk of drug-related problems (DRP) in neonatal intensive care

| Medicines      | Causes of DRP* |                |                  |             |           |
|----------------|----------------|----------------|------------------|-------------|-----------|
|                | Drug selection | Dose selection | Drug use process | Logistics   | Others†   |
| Alprostadiol   |                | 2 (12.5%)      | 6 (37.5%)        |             | 8 (50.0%) |
| Amikacin       |                | 47 (64.4%)     | 14 (19.2%)       | 8 (10.9%)   | 4 (5.5%)  |
| Amphotericin B |                | 7 (15.2%)      | 21 (45.7%)       | 11 (23.9%)  | 7 (15.2%) |
| Cefepime       |                | 16 (42.1%)     | 10 (26.32%)      | 11 (28.95%) | 1 (2.63%) |
| Ciprofloxacin  | 3 (23.08%)     | 4 (30.77%)     | 2 (15.38%)       | 4 (30.77%)  |           |
| Gentamicin     |                | 132 (62.6%)    | 73 (34.6%)       | 4 (1.9%)    | 2 (0.9%)  |
| Meropenem      | 1 (1.0%)       | 38 (38.0%)     | 25 (25.0%)       | 29 (29.0%)  | 7 (7.0%)  |
| Omeprazole     |                | 1 (3.57%)      | 15 (53.57%)      | 12 (42.86%) |           |
| Vancomycin     | 1 (1.0%)       | 28 (28.9%)     | 24 (24.74%)      | 40 (41.24%) | 4 (4.12%) |

\*Causes of DRP according to the Pharmaceutical Care Network Europe (PCNE) classification system v.6.2.<sup>4</sup>

†Others included drug form, treatment duration, and others specific causes (e. g. adverse reaction and wrong drug preparation technique).

Supplementary file 1 – PCNE systems v6.2 and operational definitions of the study for the classification of drug related problems (DRP)

| <b>Code – Categories</b>                                                                          | <b>Operational definition</b>                                                                                                                                                                      |
|---------------------------------------------------------------------------------------------------|----------------------------------------------------------------------------------------------------------------------------------------------------------------------------------------------------|
| <b>Problems</b>                                                                                   |                                                                                                                                                                                                    |
| P1 – Treatment effectiveness                                                                      | There is a (potential) problem with the (lack of) effect of the pharmacotherapy.                                                                                                                   |
| P1.1 – No effect of drug treatment/therapy failure                                                | The drug treatment cannot lead or does not lead to the improvement of the patient's symptoms (e.g. early sepsis not responsive to treatment of ampicillin and gentamicin).                         |
| P1.2 – Effect of drug treatment not optimal                                                       | The drug treatment may lead or lead to a partial improvement of the patient's symptoms (e.g. paracetamol sub-dose leading to a partial pain relief).                                               |
| P1.3 – Wrong effect of drug treatment                                                             | Not applicable for the study.                                                                                                                                                                      |
| P1.4 – Untreated indication                                                                       | There are symptoms that need treatment but are not being treated at the moment (e.g. patient has a fever but is not in drug treatment).                                                            |
| P2 – Adverse reactions                                                                            | Patient suffers, or will possibly suffer, from an adverse drug event.                                                                                                                              |
| P2.1 – Non-allergic adverse drug event                                                            | The drug treatment may be related to an unintended, non-allergic adverse event with doses normally used for the intended indication (e.g. tachycardia reportedly related to the use of caffeine).  |
| P2.2 – Allergic adverse drug event                                                                | The drug treatment may be related to an unintended, allergic adverse event with doses normally used for the intended indication (e.g. skin rash reportedly related to the use of penicillin).      |
| P2.3 – Toxic adverse drug-event                                                                   | The drug treatment may lead or lead to an unintended adverse event occurring in doses higher than that normally used for the intended indication (e.g. captopril overdose leading to hypotension). |
| P3 – Treatment costs                                                                              | The drug treatment is more expensive than necessary.                                                                                                                                               |
| P3.1 – Drug treatment more costly than necessary                                                  | The medicine is more expensive than other medicines available or there is a waste in its preparation (reconstitution and dilution).                                                                |
| P3.2 – Unnecessary drug-treatment                                                                 | The prescribed medication is not necessary or no longer necessary.                                                                                                                                 |
| P4 – Others                                                                                       | Other problems not specified above                                                                                                                                                                 |
| P4.1 – Patient dissatisfied with therapy despite optimal clinical and economic treatment outcomes | Not applicable for the study.                                                                                                                                                                      |
| P4.2 – Unclear problem/complaint                                                                  | Problem not clarified or without defined classification.                                                                                                                                           |



| Causes                                                                     |                                                                                                                                                                                                                                                                                          |
|----------------------------------------------------------------------------|------------------------------------------------------------------------------------------------------------------------------------------------------------------------------------------------------------------------------------------------------------------------------------------|
| C1 – Drug selection                                                        | The cause of the DRP is related to the selection of the drug.                                                                                                                                                                                                                            |
| C1.1 – Inappropriate drug (including contraindication)                     | Selected drug is inappropriate for the intended indication or is contraindicated for the patient (e.g. ampicillin prescribed to allergic patient).                                                                                                                                       |
| C1.2 – No indication for drug                                              | There is no indication for the selected drug.                                                                                                                                                                                                                                            |
| C1.3 – Inappropriate combination of drugs, or drugs and food               | The selected drug interacts or may interact physically, physico-chemical or chemically with other drugs or foods (e.g. patient is receiving ciprofloxacin and fluconazole, medicines that may increase the risk of QT interval prolongation and, consequently, ventricular arrhythmias). |
| C1.4 – Inappropriate duplication of therapeutic group or active ingredient | The physician order inappropriately has medicines of same therapeutic group or active ingredients to treat different symptoms (e.g. ibuprofen indicated for closure of the ductus arteriosus and paracetamol indicated for fever present in the same physician order).                   |
| C1.5 – Indication for drug-treatment not noticed                           | The appropriate drug is not used to treat the symptom because the existence of the symptom is not noticed (e.g. patient has a fever that is not noticed and, therefore, is not in drug treatment).                                                                                       |
| C1.6 – Too many drugs prescribed for indication                            | The physician order inappropriately has medicines indicated to treat the same symptoms (e.g. ranitidine and omeprazole both indicated for gastrointestinal haemorrhage present in the same physician order).                                                                             |
| C1.7 – More cost-effective drug available                                  | There are cheaper and effective (or more effective) medications to treat the symptoms.                                                                                                                                                                                                   |
| C1.8 – Synergistic/preventive drug required and not given                  | There is a requirement to use a medication to improve an existing treatment or to prevent the development of another symptom, but it is not used. (e.g. ferrous sulfate requirement for the prevention of anemia).                                                                       |
| C1.8 – New indication for drug treatment presented                         | The patient presents a new symptom that is not being treated (e.g. patient has a recent fever and requires drug treatment).                                                                                                                                                              |
| C2 – Drug form                                                             | The cause of the DRP is related to the selection of the drug form.                                                                                                                                                                                                                       |
| C2.1 – Inappropriate drug form                                             | The drug has an inappropriate form and/or formula for the patient (e.g. oral caffeine solution prescribed for neonate with feeding intolerance).                                                                                                                                         |
| C3 – Dose selection                                                        | The cause of the DRP is related to the selection of the dosage schedule.                                                                                                                                                                                                                 |
| C3.1 – Drug dose too low                                                   | Selected dose is 20% lower than the minimum dose defined for the intended indication (e.g.                                                                                                                                                                                               |

|                                                                             |                                                                                                                                                                     |
|-----------------------------------------------------------------------------|---------------------------------------------------------------------------------------------------------------------------------------------------------------------|
|                                                                             | cefepime prescribed 45 mg/kg instead of 60 mg/kg daily).                                                                                                            |
| C3.2 – Drug dose too high                                                   | Selected dose is 20% higher than the maximum dose defined for the intended indication (e.g. oxacillin prescribed 150 mg/kg instead of 100 mg/kg daily).             |
| C3.4 – Dosage regimen not frequent enough                                   | Selected dosing frequency is less than that defined for the intended indication (e.g. gentamicin prescribed every 48 hours instead of every 36 hours).              |
| C3.5 – Dosage regimen too frequent                                          | Selected dosing frequency is higher than that defined for the intended indication (e.g. amikacin prescribed every 24 hours instead of every 36 hours).              |
| C3.6 – No therapeutic drug monitoring                                       | Monitoring serum levels of the drug is required, but it is not done.                                                                                                |
| C3.7 – Pharmacokinetic problem requiring dose adjustment                    | Not applicable for the study.                                                                                                                                       |
| C3.8 – Deterioration/improvement of disease state requiring dose adjustment | Change in disease state requiring dose adjustment (e.g. vancomycin dose adjustment because of the improvement in renal function in patients with renal impairment). |
| C4 – Treatment duration                                                     | The cause of the DRP is related to the duration of therapy.                                                                                                         |
| C4.1 – Duration of treatment too short                                      | Duration of treatment is shorter than that defined for the indication treated (e.g. penicillin prescribed for eight days instead of ten days).                      |
| C4.2 – Duration of treatment too long                                       | Duration of treatment is longer than that defined for the indication treated (e.g. meropenem prescribed for sixteen days instead of fourteen days).                 |
| C5 – Drug use process                                                       | The cause of the DRP can be related to the way the patient uses the drug, in spite of proper dosage instructions (on the label).                                    |
| C5.1 – Inappropriate timing of administration and/or dosing intervals       | Drug administered at wrong times or intervals (e.g. gentamicin dose scheduled for 16 hours but administered at 18 hours).                                           |
| C5.2 – Drug under-administered                                              | Drug administered at a frequency lower than the physician order (e.g. ranitidine prescribed twice daily but administered only once).                                |
| C5.3 – Drug over-administered                                               | Drug administered at a frequency higher than the physician order (e.g. aminophylline prescribed twice daily but administered three times).                          |
| C5.4 – Drug not taken/administered at all                                   | Drug dose is not administered in full (e.g. ampicillin dose administered in half).                                                                                  |
| C5.5 – Wrong drug administered                                              | Drug is administered wrong (e.g. norepinephrine was administered in the wrong route).                                                                               |

|                                                          |                                                                                                                                                                                                              |
|----------------------------------------------------------|--------------------------------------------------------------------------------------------------------------------------------------------------------------------------------------------------------------|
| C5.6 – Drug abused (unregulated overuse)                 | Not applicable for the study.                                                                                                                                                                                |
| C5.7 – Patient unable to use drug/form as directed       | Not applicable for the study.                                                                                                                                                                                |
| C6 – Logistics                                           | The cause of the DRP can be related to the logistics of the prescribing and dispensing process.                                                                                                              |
| C6.1 – Prescribed drug not available                     | Prescribed drug is not available in the institution and there is no other effective drug (e.g. ursodiol is prescribed but not available in the hospital and there is no other drug alternative).             |
| C6.2 – Prescribing error (necessary information missing) | Missing necessary information on the drug prescription that may generate a medication error (e.g. vancomycin is prescribed, but there is no information on the minimum recommended time for administration). |
| C6.3 – Dispensing error (wrong drug or dose dispensed)   | Drug is dispensed wrong or dispensed in the wrong dosage form or dose (e.g. dispensed intravenous furosemide instead of oral).                                                                               |
| C7 – Patient                                             | The cause of the DRP can be related to the personality or behaviour of the patient.                                                                                                                          |
| C7.1 – Patient forgets to use/take drug                  | Not applicable for the study.                                                                                                                                                                                |
| C7.2 – Patient uses unnecessary drug                     | Not applicable for the study.                                                                                                                                                                                |
| C7.3 – Patient takes food that interacts                 | Not applicable for the study.                                                                                                                                                                                |
| C7.4 – Patient stored drug inappropriately               | Not applicable for the study.                                                                                                                                                                                |
| C8 – Others                                              | Other causes not specified above.                                                                                                                                                                            |
| C8.1 – Others specific causes                            | The problem arises due to other specific causes (e.g. adverse events related to alprostadil, cefepime prepared wrongly and etc.).                                                                            |
| C8.2 – No obvious cause                                  | Not applicable for the study.                                                                                                                                                                                |

**STROBE 2007 (v4) checklist of items to be included in reports of observational studies in epidemiology\***  
**Checklist for cohort, case-control, and cross-sectional studies (combined)**

| Section/Topic             | Item # | Recommendation                                                                                                                                                                                                                                                                                                                                                                                                                                                         | Reported on page # |
|---------------------------|--------|------------------------------------------------------------------------------------------------------------------------------------------------------------------------------------------------------------------------------------------------------------------------------------------------------------------------------------------------------------------------------------------------------------------------------------------------------------------------|--------------------|
| Title and abstract        | 1      | (a) Indicate the study’s design with a commonly used term in the title or the abstract                                                                                                                                                                                                                                                                                                                                                                                 | 2                  |
|                           |        | (b) Provide in the abstract an informative and balanced summary of what was done and what was found                                                                                                                                                                                                                                                                                                                                                                    | 2                  |
| <b>Introduction</b>       |        |                                                                                                                                                                                                                                                                                                                                                                                                                                                                        |                    |
| Background/rationale      | 2      | Explain the scientific background and rationale for the investigation being reported                                                                                                                                                                                                                                                                                                                                                                                   | 4                  |
| Objectives                | 3      | State specific objectives, including any pre-specified hypotheses                                                                                                                                                                                                                                                                                                                                                                                                      | 4/5                |
| <b>Methods</b>            |        |                                                                                                                                                                                                                                                                                                                                                                                                                                                                        |                    |
| Study design              | 4      | Present key elements of study design early in the paper                                                                                                                                                                                                                                                                                                                                                                                                                | 5                  |
| Setting                   | 5      | Describe the setting, locations, and relevant dates, including periods of recruitment, exposure, follow-up, and data collection                                                                                                                                                                                                                                                                                                                                        | 5                  |
| Participants              | 6      | (a) <i>Cohort study</i> —Give the eligibility criteria, and the sources and methods of selection of participants. Describe methods of follow-up<br><i>Case-control study</i> —Give the eligibility criteria, and the sources and methods of case ascertainment and control selection. Give the rationale for the choice of cases and controls<br><i>Cross-sectional study</i> —Give the eligibility criteria, and the sources and methods of selection of participants | 5                  |
|                           |        | (b) <i>Cohort study</i> —For matched studies, give matching criteria and number of exposed and unexposed<br><i>Case-control study</i> —For matched studies, give matching criteria and the number of controls per case                                                                                                                                                                                                                                                 |                    |
| Variables                 | 7      | Clearly define all outcomes, exposures, predictors, potential confounders, and effect modifiers. Give diagnostic criteria, if applicable                                                                                                                                                                                                                                                                                                                               | 5                  |
| Data sources/ measurement | 8*     | For each variable of interest, give sources of data and details of methods of assessment (measurement). Describe comparability of assessment methods if there is more than one group                                                                                                                                                                                                                                                                                   | 5                  |
| Bias                      | 9      | Describe any efforts to address potential sources of bias                                                                                                                                                                                                                                                                                                                                                                                                              | 5                  |
| Study size                | 10     | Explain how the study size was arrived at                                                                                                                                                                                                                                                                                                                                                                                                                              | 5/6                |
| Quantitative variables    | 11     | Explain how quantitative variables were handled in the analyses. If applicable, describe which groupings were chosen and why                                                                                                                                                                                                                                                                                                                                           | 6                  |
| Statistical methods       | 12     | (a) Describe all statistical methods, including those used to control for confounding                                                                                                                                                                                                                                                                                                                                                                                  | 6                  |
|                           |        | (b) Describe any methods used to examine subgroups and interactions                                                                                                                                                                                                                                                                                                                                                                                                    | 6                  |
|                           |        | (c) Explain how missing data were addressed                                                                                                                                                                                                                                                                                                                                                                                                                            | 6                  |
|                           |        | (d) <i>Cohort study</i> —If applicable, explain how loss to follow-up was addressed<br><i>Case-control study</i> —If applicable, explain how matching of cases and controls was addressed                                                                                                                                                                                                                                                                              |                    |

|                          |     |                                                                                                                                                                                                              |        |
|--------------------------|-----|--------------------------------------------------------------------------------------------------------------------------------------------------------------------------------------------------------------|--------|
|                          |     | <i>Cross-sectional study</i> —If applicable, describe analytical methods taking account of sampling strategy                                                                                                 |        |
|                          |     | (e) Describe any sensitivity analyses                                                                                                                                                                        |        |
| <b>Results</b>           |     |                                                                                                                                                                                                              |        |
| Participants             | 13* | (a) Report numbers of individuals at each stage of study—eg numbers potentially eligible, examined for eligibility, confirmed eligible, included in the study, completing follow-up, and analysed            | 6      |
|                          |     | (b) Give reasons for non-participation at each stage                                                                                                                                                         | 6      |
|                          |     | (c) Consider use of a flow diagram                                                                                                                                                                           |        |
| Descriptive data         | 14* | (a) Give characteristics of study participants (eg demographic, clinical, social) and information on exposures and potential confounders                                                                     | 6/7    |
|                          |     | (b) Indicate number of participants with missing data for each variable of interest                                                                                                                          | 7      |
|                          |     | (c) <i>Cohort study</i> —Summarise follow-up time (eg, average and total amount)                                                                                                                             | 6      |
| Outcome data             | 15* | <i>Cohort study</i> —Report numbers of outcome events or summary measures over time                                                                                                                          | 7      |
|                          |     | <i>Case-control study</i> —Report numbers in each exposure category, or summary measures of exposure                                                                                                         |        |
|                          |     | <i>Cross-sectional study</i> —Report numbers of outcome events or summary measures                                                                                                                           |        |
| Main results             | 16  | (a) Give unadjusted estimates and, if applicable, confounder-adjusted estimates and their precision (eg, 95% confidence interval). Make clear which confounders were adjusted for and why they were included | 7/8    |
|                          |     | (b) Report category boundaries when continuous variables were categorized                                                                                                                                    |        |
|                          |     | (c) If relevant, consider translating estimates of relative risk into absolute risk for a meaningful time period                                                                                             |        |
| Other analyses           | 17  | Report other analyses done—eg analyses of subgroups and interactions, and sensitivity analyses                                                                                                               | 7/8    |
| <b>Discussion</b>        |     |                                                                                                                                                                                                              |        |
| Key results              | 18  | Summarise key results with reference to study objectives                                                                                                                                                     | 8      |
| Limitations              | 19  | Discuss limitations of the study, taking into account sources of potential bias or imprecision. Discuss both direction and magnitude of any potential bias                                                   | 11     |
| Interpretation           | 20  | Give a cautious overall interpretation of results considering objectives, limitations, multiplicity of analyses, results from similar studies, and other relevant evidence                                   | 8/9/10 |
| Generalisability         | 21  | Discuss the generalisability (external validity) of the study results                                                                                                                                        | 11     |
| <b>Other information</b> |     |                                                                                                                                                                                                              |        |
| Funding                  | 22  | Give the source of funding and the role of the funders for the present study and, if applicable, for the original study on which the present article is based                                                | 12     |

\*Give information separately for cases and controls in case-control studies and, if applicable, for exposed and unexposed groups in cohort and cross-sectional studies.

**Note:** An Explanation and Elaboration article discusses each checklist item and gives methodological background and published examples of transparent reporting. The STROBE checklist is best used in conjunction with this article (freely available on the Web sites of PLoS Medicine at <http://www.plosmedicine.org/>, Annals of Internal Medicine at <http://www.annals.org/>, and Epidemiology at <http://www.epidem.com/>). Information on the STROBE Initiative is available at [www.strobe-statement.org](http://www.strobe-statement.org).

# BMJ Open

## Risk assessment of patient factors and medications for drug-related problems from a prospective longitudinal study of newborns admitted to a neonatal intensive care unit

|                                 |                                                                                                                                                                                                                                                                                                                                                                                                                                                                                                    |
|---------------------------------|----------------------------------------------------------------------------------------------------------------------------------------------------------------------------------------------------------------------------------------------------------------------------------------------------------------------------------------------------------------------------------------------------------------------------------------------------------------------------------------------------|
| Journal:                        | <i>BMJ Open</i>                                                                                                                                                                                                                                                                                                                                                                                                                                                                                    |
| Manuscript ID                   | bmjopen-2018-024377.R2                                                                                                                                                                                                                                                                                                                                                                                                                                                                             |
| Article Type:                   | Research                                                                                                                                                                                                                                                                                                                                                                                                                                                                                           |
| Date Submitted by the Author:   | 18-Mar-2019                                                                                                                                                                                                                                                                                                                                                                                                                                                                                        |
| Complete List of Authors:       | Leopoldino, Ramon; Universidade Federal do Rio Grande do Norte Centro de Ciencias da Saude, Pharmacy<br>Santos, Marco; Maternidade Escola Januário Cicco<br>Costa, Tatiana; Universidade Federal do Rio Grande do Norte/ Maternidade Escola Januário Cicco<br>Martins, Rand; Universidade Federal do Rio Grande do Norte Centro de Ciencias da Saude, Department of Pharmacy<br>Oliveira, António; Universidade Federal do Rio Grande do Norte Centro de Ciencias da Saude, Department of Pharmacy |
| <b>Primary Subject Heading</b>: | Paediatrics                                                                                                                                                                                                                                                                                                                                                                                                                                                                                        |
| Secondary Subject Heading:      | Intensive care, Pharmacology and therapeutics                                                                                                                                                                                                                                                                                                                                                                                                                                                      |
| Keywords:                       | Neonatal intensive & critical care < INTENSIVE & CRITICAL CARE, Health & safety < HEALTH SERVICES ADMINISTRATION & MANAGEMENT, Adverse events < THERAPEUTICS                                                                                                                                                                                                                                                                                                                                       |
|                                 |                                                                                                                                                                                                                                                                                                                                                                                                                                                                                                    |

SCHOLARONE™  
Manuscripts

1  
2  
3 **Title:** Risk assessment of patient factors and medications for drug-related problems from a  
4  
5 prospective longitudinal study of newborns admitted to a neonatal intensive care unit  
6

7 **Running title:** Drug-related problems in neonatal care  
8  
9

10  
11  
12 **Authors:** Ramon D. Leopoldino<sup>1</sup>, Marco T. Santos<sup>2</sup>, Tatiana X. Costa<sup>2</sup>, Rand R. Martins<sup>1</sup>,  
13  
14 António G. Oliveira<sup>1</sup>  
15  
16

17  
18  
19 **Affiliation of authors:**  
20

21 1. Department of Pharmacy, Centro de Ciências da Saúde, Universidade Federal do Rio Grande  
22  
23 do Norte, Natal, Brazil.  
24

25  
26 2. Maternity School Januário Cicco, Universidade Federal do Rio Grande do Norte, Natal,  
27  
28 Brazil.  
29

30  
31  
32  
33 **Correspondence to:** Mr Ramon D. Leopoldino, PharmD; ramon.weyler@gmail.com.  
34  
35

36  
37 **Key words:** Neonatal intensive & critical care; Health & safety; Adverse events  
38  
39

40  
41  
42 **Abstract:** 262 words  
43

44 **Text:** 3,178 words  
45

46 **Tables and Figures:** 4  
47  
48  
49  
50  
51  
52  
53  
54  
55  
56  
57  
58  
59  
60

## ABSTRACT

**Objective:** To identify patient factors and medications associated with the occurrence of Drug Related Problems (DRP) in neonates admitted to Neonatal Intensive Care Units (NICU).

**Design:** Prospective longitudinal study.

**Setting:** NICU of a teaching hospital in Brazil.

**Participants:** The data were collected from the records of the clinical pharmacy service of all neonates admitted between April 2014 and January 2017, excluding neonates with length of stay in the NICU < 24 hours or without prescribed drugs.

**Primary outcome measures:** The occurrence of one or more DRP (conditions interfering in the patient's pharmacotherapy with potential undesired clinical outcomes).

**Results:** The study observed 600 neonates who had a median length of stay in the NICU of 13 days (range 2 to 278 days). DRP were identified in most neonates (60.5%). In a multivariate logistic regression model, the factors independently associated with DRP were gestational age (adjusted odds-ratio (AOR) 0.85, 95% confidence interval (CI) 0.81–0.89), 5-minute APGAR < 7 (AOR 1.74, 95% CI 1.00–3.13), neurological disease (AOR 2.49, 95%CI 1.09–5.69), renal disease (AOR 5.75, 95%CI 1.85–17.8) and cardiac disease (AOR 2.36, 95%CI 1.31–4.24). The medications with greater risk for DRP were amphotericin B (AOR 4.80), meropenem (AOR 4.09), alprostadil (AOR 3.38), vancomycin (AOR 3.34), ciprofloxacin (AOR 3.03), gentamicin (AOR 2.43), cefepime (AOR 1.88), amikacin (AOR 1.82) and omeprazole (AOR 1.66). These medicines represent one-third of all prescribed drugs.

**Conclusions:** Gestational age, 5-minute APGAR < 7 and neurological, cardiac and renal disease are risk factors for DRP in NICUs. Alprostadil, omeprazole and several anti-infectives were associated with greater risk of DRP.



## STRENGTHS AND LIMITATIONS OF THIS STUDY

- This is the first study identifying patient variables and drugs associated with the occurrence of Drug-related problems (DRP), exclusively in Neonatal Intensive Care Unit (NICU) patients.
- The validity of the results is strengthened by the large cohort size, the prospective data collection, the longitudinal design, the in-situ evaluation of DRP and the adoption of a well-known DRP classification system.
- However, the data were obtained from a single institution, which may somehow impair the generalization of our findings.
- It is also possible that administration errors have been under-estimated by recording failures.

## INTRODUCTION

The Intensive Care Unit (ICU) is a complex environment, characterized by polypharmacy, transfusions and frequent surgical procedures.<sup>1</sup> Neonatal Intensive Care Units (NICU) may pose additional hazards to patient safety because of the frequent usage of off-label and unlicensed medicines and of decimal dilutions of intravenous medicines.<sup>2,3</sup> In addition, because of their physiological immaturity and rapid growth, neonates exhibit large interindividual variability in drug metabolism and excretion.<sup>2</sup> Such characteristics may predispose neonates to drug-related problems (DRP).

DRP are events or circumstances arising from the patient's pharmacotherapy that may actually or potentially interfere with health outcomes.<sup>4</sup> Those events include errors in the drug therapy processes (prescription, dispensation and administration) and adverse drug events (any untoward event related to medication that results in harm to the patient).<sup>5-7</sup>

In paediatric wards, DRP occur in about half of the patients and most of these are preventable.<sup>8</sup> However, there is very little information on DRP in children in intensive care units, especially among neonates.

It is believed that DRP are particularly frequent and serious in neonates.<sup>9, 10</sup> Neonates are very sensitive to dose variations because of their particular pharmacokinetics and pharmacodynamics, consequence of the lower drug metabolism and clearance, low levels of plasma proteins, high proportion of body water and level of receptor expression and sensitivity.<sup>11, 12</sup> Some authors have shown that harm involving medicines is common in NICUs, with incidence rates ranging from 10 to 20 cases per 1,000 patient-days.<sup>13, 14</sup> Such harm can lead to prolonged hospitalization time and, in extreme cases, to the death of patients. It also generates an increase in hospital costs.<sup>13, 15</sup> Thus, the development of effective preventive strategies directed to DRP is of great relevance for the improvement of health care and one step towards this goal is the identification of patients susceptible to DRP.<sup>16</sup>

1  
2  
3 Therefore, the purpose of this study was to identify risk factors for the occurrence of  
4 one or more DRP in NICU, to assess the risk associated with commonly used medications and  
5 to describe the causes of DRP in the medications with greater risk of DRP in neonates.  
6  
7  
8  
9  
10  
11

## 12 **METHODS**

13  
14 This was an observational, prospective, longitudinal study conducted from April 2014  
15 to January 2017 in the 20-bed NICU of a teaching maternity hospital specialized in high-risk  
16 pregnancy. All neonates admitted to the NICU during the study period were prospectively  
17 evaluated for inclusion in the study. Inclusion criteria were a NICU stay longer than 24 hours  
18 and at least one prescribed drug. Neonates who were prescribed exclusively with electrolytes,  
19 parenteral nutrition, blood products, oxygen therapy, diagnostic agents, and vitamin and  
20 mineral supplements were excluded from the study, as those products were not considered as  
21 drugs.  
22  
23  
24  
25  
26  
27  
28  
29  
30  
31  
32

33 In the absence of information in the literature on risk factors for DRP in neonates, the patient  
34 variables selected as candidates for assessment in a multivariate risk model were those that could be  
35 collected at NICU admission on every neonate and that reflect serious conditions that are usually  
36 associated with enhanced pharmacotherapy. The data collected from each neonate included sex,  
37 gestational age, birth weight, type of delivery (vaginal or caesarean), occurrence of premature  
38 rupture of membranes (PROM), 1-minute and 5-minute APGAR, a diagnosis of neurological,  
39 renal or cardiac disorder, and malformations. The APGAR is a score that evaluates the birth  
40 condition of newborns in the first and fifth minutes of life, values below seven being considered  
41 an ominous sign.<sup>17</sup> In addition to those risk factors that may be predictors of DRP, patient  
42 variables representing the complexity of care (number of unique medications prescribed,  
43 number of different clinical problems, and NICU length of stay in days) were also collected  
44 from each patient.  
45  
46  
47  
48  
49  
50  
51  
52  
53  
54  
55  
56  
57  
58  
59  
60

1  
2  
3 The study also wanted to identify medications that were associated with increased risk  
4 of DRP in neonates and, therefore, all the medications prescribed to each neonate during the  
5 NICU stay were recorded.  
6  
7  
8  
9

10 The identification of DRP was actively performed on a daily basis by the NICU clinical  
11 pharmacy team (a chief pharmacist and four assistant pharmacists) through the analysis of  
12 medical charts, medication orders and nursing records, seeking entries that might indicate the  
13 occurrence of a DRP. The pharmacists involved in this research were permanent members of the  
14 clinical pharmacy team allocated to the NICU of our institution. The identification of DRP and their  
15 notification to the medical team is an important part of their routine work and all were experienced in  
16 the detection of DRP. For each identified DRP, its causes were then classified according to the  
17 Pharmaceutical Care Network Europe system v.6.2<sup>4</sup> (see supplementary file 1). This  
18 classification was carried out independently by two pharmacists (RDL and MTS), supported by  
19 the Neofax® textbook (Thomson Reuters, New York, USA), as well as the Micromedex®  
20 (Truven Health Analytics, Michigan, USA) and Uptodate® (WoltersKluwer, Alphenaan  
21 den Rijn, NL) databases that provided authoritative information on adverse drug reaction and drug-  
22 drug interactions. Whenever the two evaluators disagreed upon the classification of the cause  
23 of a DRP, a third pharmacist (TXC) was called in to break the tie.  
24  
25  
26  
27  
28  
29  
30  
31  
32  
33  
34  
35  
36  
37  
38  
39  
40  
41  
42  
43

#### 44 **Statistical analysis**

45  
46 The target sample size was set at 600 patients, a number that would afford 70% power to  
47 identify associations with an odds-ratio of 1.30 or greater for patient factors with a prevalence  
48 over 30%<sup>18</sup>. All variables are described by mean±standard deviation, median (range), or as  
49 absolute and relative frequency, as appropriate. For the identification of risk factors of DRP, an  
50 initial selection of patient variables at NICU admission (sex, gestational age, birth weight, type  
51 of delivery, occurrence of PROM, 1-minute and 5-minute APGAR, a diagnosis of neurological,  
52 renal or cardiac disorder, and malformations) were tested for association with the occurrence  
53  
54  
55  
56  
57  
58  
59  
60

1  
2  
3 of one or more DRP with logistic regression. All variables were binary, except gestational age  
4 and birth weight that were continuous. The set of patient variables whose association with DRP  
5 was statistically significant at the 0.10 significance level in univariate logistic regression was  
6 analysed by stepwise backward multiple logistic regression, and those variables significant at  
7 the 0.05 level were retained in the final model. Variables collected only at discharge from the  
8 NICU (number of unique medications, length of stay and number of clinical problems) were  
9 analysed in a separate logistic model consisting of those three variables. Results of these  
10 analyses are presented as odds-ratios adjusted by the other variables in the model (AOR) and  
11 95% confidence intervals (CI). The model was  $\ln[p(\text{DRP}=1)/p(\text{DRP}=0)] = \beta_0 + \beta_i x_i$ , where  $\beta_0$   
12 is the regression constant,  $\beta_i$  the partial regression coefficients and  $x_i$  the independent variables.  
13  
14  
15  
16  
17  
18  
19  
20  
21  
22  
23  
24  
25

26 It was hypothesized that some medications could be singled out because they are  
27 associated with a significantly higher risk of DRP, through a combination of complex dosing  
28 and/or administration, and of frequency of use. Those drugs would be high-risk medications  
29 requiring close monitoring from the clinical pharmacy team. In the NICU setting, very often  
30 several medications are prescribed concurrently, sometimes by simultaneously through the  
31 same intravenous line, and accounting for the interplay of all medications administered to a  
32 patient at a given in a statistical model would be unmanageable. Therefore, the estimation of  
33 the risk of DRP associated with each medication was based on a simpler model, where the risk  
34 of DRP observed with a given medication was compared to the average risk observed with all  
35 other medications prescribed to this patient population, controlling for the risk factors at NICU  
36 admission for DRP that were identified in the previous analysis. For this analysis, a set of  
37 multiple logistic regressions with each drug as independent variable and adjusted by the risk  
38 factors at NICU admission identified in the previous analysis was evaluated and, for those  
39 medications where a statistically significant association with the occurrence of one or more  
40 DRP was found at the 5% significance level, results are presented as adjusted odds-ratios of  
41  
42  
43  
44  
45  
46  
47  
48  
49  
50  
51  
52  
53  
54  
55  
56  
57  
58  
59  
60

1  
2  
3  
4  
5  
6  
7  
8  
9  
10  
11  
12  
13  
14  
15  
16  
17  
18  
19  
20  
21  
22  
23  
24  
25  
26  
27  
28  
29  
30  
31  
32  
33  
34  
35  
36  
37  
38  
39  
40  
41  
42  
43  
44  
45  
46  
47  
48  
49  
50  
51  
52  
53  
54  
55  
56  
57  
58  
59  
60

DRP with that medication to the average risk of all the other medications prescribed. The model was  $\ln[p(\text{DRP}=1)/p(\text{DRP}=0)] = \beta_0 + \beta_1x_1 + \beta_ix_i$ , where  $\beta_0$  is the regression constant,  $\beta$  are the partial regression coefficients,  $x_1$  a binary variable coding for the medication, and  $x_i$  the co-variables. In the drugs identified in the previous analysis as high-risk medications, the respective causes of DRP are presented descriptively. The interaction of each of those high-risk medications with each risk factor previously identified was tested with multiple logistic regression, with significant interactions assumed at the  $p<0.10$  level. The model was  $\ln[p(\text{DRP}=1)/p(\text{DRP}=0)] = \beta_0 + \beta_1x_1 + \beta_ix_i + \beta_{jx_1x_i}$ , where  $\beta_0$  is the regression constant,  $\beta$  are the partial regression coefficients,  $x_1$  a binary variable coding for the medication,  $x_i$  the co-variables and  $\beta_{jx_1x_i}$  the interaction of the medication with each co-variable. Statistical analysis was performed with Stata 11 (Stata Corporation, College Station, TX, USA).

### **Patient and Public Involvement**

Patients were not involved in the study.

### **RESULTS**

During the 34-month study period, a total of 627 newborns were admitted to the NICU. Of these, 15 newborns were excluded (13 because they had no drugs prescribed and two patients in whom the length of stay was less than 24 hours). Six hundred twelve newborns remained eligible but 12 (1.96%) were excluded from the analysis because they had missing pharmacotherapy follow-up data. The analysis set of 600 newborns was observed for a total of 15,836 NICU days, with a median of 13 days (range 2 – 278 days). The study population consisted of 265 females (45.1%) and the mean gestational age was  $32.1\pm 4.1$  weeks. On average,  $8.2\pm 6.0$  medicines were prescribed to each newborn during the NICU stay. A total of 1,115 DRP were identified, with a mean of  $1.9\pm 2.6$  DRP per patient. There were 237 (39.5%)

1  
2  
3 patients with no DRP, 132 (22.0%) with one DRP, 71 (11.8%) with two DRP, and 160 (26.7%)  
4  
5 with three or more DRP. Multiple DRP in the same patient could occur concurrently or  
6  
7 simultaneously. Sixty-eight neonates (11.3%) died during the study (Table 1).  
8  
9

10 As shown in Table 2, univariate logistic regression analysis identified eight patient  
11  
12 variables at admission that were associated with DRP: lower gestational age, lower birth weight,  
13  
14 vaginal delivery, 1-minute and 5-minute APGAR < 7, neurological disorder, renal disorder, and  
15  
16 cardiovascular disorder. In the multivariate logistic regression model, five remained significant:  
17  
18 lower gestational age ( $33.5 \pm 3.7$  vs.  $31.2 \pm 4.1$  weeks, adjusted odds-ratio (AOR) 0.85,  $p < 0.01$ ),  
19  
20 5-minute APGAR < 7 (73.7% vs. 26.3%, AOR 1.74,  $p < 0.01$ ), neurological disorder (75.5% vs.  
21  
22 24.5%, AOR 2.49,  $p = 0.03$ ), renal disorder (92.3% vs. 7.7%, AOR 5.75,  $p < 0.01$ ) and cardiac  
23  
24 disorder (73.8% vs. 26.2%, AOR 2.36,  $p < 0.01$ ) were risk factors at admission for DRP. The *c*-  
25  
26 statistic for the multivariate model with five variables was 0.72.  
27  
28  
29

30  
31 DRP were associated with increased length of stay ( $38.2 \pm 39.6$  days vs.  $10.8 \pm 9.9$  days,  
32  
33 AOR 1.04,  $p < 0.001$ ), number of prescribed drugs ( $10.6 \pm 6.3$  vs.  $4.6 \pm 3.0$ , AOR 1.22,  $p < 0.001$ )  
34  
35 and number of clinical problems ( $5.57 \pm 2.86$  vs.  $3.39 \pm 1.51$ , AOR 1.22,  $p < 0.001$ ). There was no  
36  
37 evidence of an association with a fatal outcome (11.4% vs. 11.3%,  $p = 0.702$ ).  
38  
39

40 Table 3 shows the medicines with a statistically significant increased risk of DRP  
41  
42 compared to all the other prescribed medicines, adjusted for gestational age, 5-minute APGAR  
43  
44 score < 7, neurological disorder, renal disorder and cardiac disorder. The medications, and  
45  
46 corresponding adjusted odds-ratios, were amphotericin B (AOR 4.80), meropenem (AOR 4.09),  
47  
48 alprostadil (AOR 3.38), vancomycin (AOR 3.34), ciprofloxacin (AOR 3.03), gentamicin (AOR  
49  
50 2.43), cefepime (AOR 1.88), amikacin (AOR 1.82) and omeprazole (AOR 1.66). Related to  
51  
52 increase in the occurrence of DRP, there were statistically significant interactions between renal  
53  
54 disease and the prescription of amphotericin ( $p = 0.084$ ) and of meropenem ( $p = 0.054$ ), and  
55  
56 between a 5-minute APGAR score < 7 and prescription of vancomycin ( $p = 0.038$ ).  
57  
58  
59  
60

1  
2  
3 The frequency of prescription, and the prevalence of DRP related to those medications  
4 are also displayed in Table 3. These nine drugs represent 28.4% (1,395/4,917) of all medications  
5 prescribed in the NICU and accounted for 49.7% (622/1,252) of problems involving  
6 medications. The most prescribed medicines in the group were gentamicin (10.5%, 518) and  
7 meropenem (3.1%, 152), and these drugs were also the most often involved in DRP (16.9%,  
8 211 and 8.0%, 100 respectively).

9  
10  
11  
12  
13  
14  
15  
16  
17 As for the causes of DRP involving the nine medicines (Table 4), dose selection was the  
18 most common cause for gentamicin (62.6%), amikacin (64.4%), meropenem (38.0%), cefepime  
19 (42.1%) and ciprofloxacin (30.77%). DRP involving omeprazole (53.57%), amphotericin B  
20 (45.7%) were most often related to drug use process. Alprostadil was mainly involved in others  
21 causes as wrong drug preparation technique (18.75%) and suspected adverse reaction (31.25%).  
22  
23  
24  
25  
26  
27  
28  
29  
30  
31  
32  
33  
34  
35  
36  
37  
38  
39  
40  
41  
42  
43  
44  
45  
46  
47  
48  
49  
50  
51  
52  
53  
54  
55  
56  
57  
58  
59  
60  
Vancomycin was most often implicated in errors of prescription logistics (41.24%).

## DISCUSSION

35  
36  
37  
38  
39  
40  
41  
42  
43  
44  
45  
46  
47  
48  
49  
50  
51  
52  
53  
54  
55  
56  
57  
58  
59  
60  
In our study, we observed that neonates with low gestational age, low 5-minute APGAR, neurological disorder, renal disorder and cardiac disorder are more likely to have DRP during their stay in NICU. An assessment of the risk of DRP was made for alprostadil, amikacin, amphotericin B, cefepime, ciprofloxacin, gentamicin, meropenem, omeprazole and vancomycin. Such medicines accounted for less than one-third of the drugs prescribed in the NICU, and were involved in half of DRP, the majority being related to drug dose and to drug use.

51  
52  
53  
54  
55  
56  
57  
58  
59  
60  
Only a few studies have identified risk factors for the occurrence of DRP in hospitalized patients. Most of those studies were conducted in adult and pediatric wards for periods under six months and enrolled fewer than 400 patients.<sup>19 – 22</sup> We performed a study in the NICU involving 600 neonates for a period of three years and presenting a set of different predictor



1  
2  
3 variables. Comparisons to the results of other studies are therefore difficult. Even so, several  
4 risk factors related to DRP identified in our study, such as age and clinical problems (cardiac,  
5 neurological and renal disorders), were also observed in the works of Urbina et al.<sup>16</sup>, Peterson  
6 et al.<sup>21</sup> and Blix et al.<sup>23</sup> although those studies were conducted in adult patients.  
7  
8  
9

10  
11  
12 We also found that a low 5-minute APGAR was associated with a higher risk of DRP.  
13 This predictor is a specific neonatology parameter that measures the condition of the newborn  
14 at birth.<sup>24</sup> A low APGAR score usually represents a serious situation with the corresponding  
15 need for several therapeutic interventions which, in turn, increase the risk of DRP.  
16  
17  
18  
19

20  
21 The detection of the clinical variables associated with DRP, as well as knowledge of the  
22 risk of DRP associated with each medication, represents a first step for the development of  
23 preventive strategies for enhanced patient safety and improvements in the process of care. Blix  
24 et al.<sup>23</sup> were the first authors to present risk estimates for drugs, while other papers<sup>8, 19 – 22, 25, 26</sup>  
25 have only described drugs involved in DRP. We were able to quantify the risk of DRP for a set  
26 of drugs that are involved in half of all DRP, namely alprostadil, omeprazole and several  
27 antimicrobials (amikacin, cefepime, ciprofloxacin, gentamicin, meropenem, amphotericin B  
28 and vancomycin). Pawluk et al.<sup>25</sup> e Stavroudis et al.<sup>26</sup> claimed that the risk of DRP associated  
29 with a medicine is directly related to the frequency of prescription. However, our results show  
30 that the medicines with greater odds of DRP (vancomycin and amphotericin B) were not the  
31 most prescribed. These results suggest that the risk of DRP is primarily associated with the  
32 chemical and pharmacological properties of a drug, therefore strongly related to the level of  
33 difficulty on setting the appropriate dose and on the drug's potential for adverse reactions,  
34 interactions and incompatibilities.  
35  
36  
37  
38  
39  
40  
41  
42  
43  
44  
45  
46  
47  
48  
49  
50  
51  
52

53 Inappropriate dose selection was the most common cause of DRP for aminoglycosides,  
54 cefepime and meropenem. In neonates, the adjustment of dose and regimen of antibiotics is  
55 extremely complex, the main reason for this being the rapid change in weight during the first  
56  
57  
58  
59  
60

1  
2  
3 days of life, as well as significant heterogeneity in the maturation of organs and systems across  
4 newborns.<sup>12, 27</sup> The lower than the recommended doses of those medicines administered in this  
5 study were often due to a delay in the adjustment of the medication dose to the rapid weight  
6 gain of the neonate.  
7  
8  
9  
10

11  
12 We observed that amphotericin B, ciprofloxacin and omeprazole were associated with  
13 inappropriate process of drug use, specifically with drug administration error, with drug  
14 incompatibility being the most frequent cause. Neonates have a high risk of exposure to drug  
15 incompatibilities because of the limited number of intravenous accesses, often leading to  
16 simultaneous administration of incompatible drugs through the same intravenous line. In  
17 addition, the requirements for delivery of drugs in this population, such as dilutions and reduced  
18 infusion rates, can lead to incompatibilities because of high concentrations and longer time of  
19 contact between incompatible medicines.<sup>28</sup> Such problems may be implicated in therapeutic  
20 failures due to drug degradation and even to thromboembolic complications, including cases of  
21 deaths, due to the precipitate formed reaching the bloodstream.<sup>29–31</sup>  
22  
23  
24  
25  
26  
27  
28  
29  
30  
31  
32  
33  
34

35 Another medicine that had potential incompatibilities as the main cause of DRP was  
36 alprostadil. However, this medicine stands out for the significant percentage of cases of  
37 suspected adverse reactions. Fever, leukocytosis, dyspnea are reactions commonly observed in  
38 the neonate soon after the administration of alprostadil.<sup>32</sup> Because of these reactions and  
39 complications, this medication is for intensive therapy only.  
40  
41  
42  
43  
44  
45  
46

47 The most common cause of vancomycin-related problems was errors of prescription  
48 logistics. These errors are characterized by the lack of important information in the prescription  
49 for the safe administration of the medications, or by the non-justifiable prescription of non-  
50 standard medicines in the institution. The lack of information on the time length of the infusion  
51 on the prescription was the most common error involving vancomycin, an important problem  
52  
53  
54  
55  
56  
57  
58  
59  
60

1  
2  
3 because rapid infusions in less than 60 minutes can lead to macular or maculopapular skin  
4  
5 rashes (red man syndrome).<sup>33</sup>  
6

7  
8 This study has some limitations. The data were obtained from a single institution, which  
9  
10 may somehow impair the generalization of our findings. Furthermore, as DRP were identified  
11  
12 from patient records and medical reports, it is possible that administration errors have been  
13  
14 under-estimated by recording failures. However, the same methodology has been adopted by  
15  
16 other studies in DRP and, considering the scarcity of papers related to the topic of risk factors  
17  
18 for DRP in NICU patients, we believe that our results are relevant. The large cohort size, the  
19  
20 prospective data collection, the longitudinal design, the in-situ evaluation of DRP and the  
21  
22 adoption of a well-known DRP classification system are methodological features that contribute  
23  
24 to the validity of our results. To our knowledge, this is the first study identifying patient  
25  
26 variables and drugs associated with the occurrence of DRP, exclusively in NICU patients. The  
27  
28 detection of those predictors is of great value for the identification of patients more prone to  
29  
30 DRP and, therefore, for the development of screening tools. Such tools can support the work of  
31  
32 the healthcare team, especially the clinical pharmacist, with the strengthening of preventive  
33  
34 strategies and the optimization of resources and time.  
35  
36  
37  
38

39  
40 Further research is needed in order to deepen the study of factors associated with DRP,  
41  
42 aiming at the elaboration of risk stratification tools. Future studies should also analyse the  
43  
44 influence of external factors on the incidence of DRP, which have not been addressed in our  
45  
46 study, such as the number and characteristics of the NICU team members, the workplace  
47  
48 conditions, the intra-team and inter-team communication, and the organization of the hospital.  
49  
50 Another issue of considerable importance would be the investigation of clinical outcomes of  
51  
52 DRP in NICUs.  
53  
54

## 55 56 57 58 **CONCLUSION** 59 60

1  
2  
3 In conclusion, low gestational age, low 5-minute APGAR, neurological disorder, renal  
4 disorder and cardiac disorder are risk factors associated with the occurrence of DRP. We also  
5 list nine medications with a risk for DRP above the average risk of other medications:  
6 alprostadil, amikacin, amphotericin B, cefepime, ciprofloxacin, gentamicin, meropenem,  
7 omeprazole and vancomycin. Although they are the most involved in DRP, these medicines  
8 account for less than one-third of the drugs prescribed in NICU. Inappropriate dose selection  
9 and inappropriate drug use (mainly potential drug incompatibilities) were the main causes of  
10 DRP related to those medicines.  
11  
12  
13  
14  
15  
16  
17  
18  
19  
20  
21  
22  
23

24 **Acknowledgements** We are grateful to all pharmacists of the maternity hospital, especially to  
25 the pharmacists Dr. Elaine Alves and Dr. Tayne Cortez for contributing to the elaboration of  
26 the research project, the pharmacy residents Kadine Pontes and Bruna Nunes for making  
27 available the records of pharmacotherapeutic follow-up of patients, and pharmacy students  
28 Mayara Alves and Amanda Nascimento for helping in data collection and tabulation. We also  
29 thank all members of the NICU, physicians, physiotherapists, nurses and auxiliaries.  
30  
31  
32  
33  
34  
35  
36

37 **Contributions** RDL participated in all stages of the study. MTS and TXC participated in the  
38 study design and revision of the manuscript. RRM and AGO contributed to the design and  
39 analysis of the study and the writing and revision of the manuscript. All authors approved the  
40 final version of the manuscript.  
41  
42  
43  
44  
45  
46

47 **Funding** This study received fund from the National Council of Technological and Scientific  
48 Development (CNPq).  
49

50  
51 **Competing interests** None declared.  
52

53  
54 **Patient consent** Not required.  
55  
56  
57  
58  
59  
60

**Ethics approval** This study was approved by the Institutional Review Board of the University Hospital Onofre Lopes (No. 580.201/2014), who waived the need for written informed consent because the study only evaluated data collected from clinical pharmacy records.

**Provenance and peer review** Not commissioned; externally peer reviewed.

**Data sharing statement** All data relevant to the study are included in the article or uploaded as supplementary information.

## REFERENCES

1. Raju TNK, Suresh G, Higgins RD. Patient Safety in the Context of Neonatal Intensive Care: Research and Educational Opportunities. *Pediatr Res* 2011;70:109–15.
2. Sorrentino E, Alegiani C. Medication errors in the neonate. *J Matern Fetal Neonatal Med* 2012; 25:83–5.
3. Chappell K, Newman C. Potential tenfold drug overdoses on a neonatal unit. *Arch Dis Child Fetal Neonatal Ed* 2004;89:F483–F484.
4. Pharmaceutical Care Network Europe (PCNE). The PCNE Classification V 6.2. 2010 [http://www.pcne.org/upload/files/11\\_PCNE\\_classification\\_V6-2.pdf/](http://www.pcne.org/upload/files/11_PCNE_classification_V6-2.pdf/) (accessed 15 April 2018).
5. Bates DW, Cullen DJ, Laird N, et al. Incidence of adverse drug events and potential adverse drug events: implication for prevention. *JAMA* 1995;274:29–34.
6. Kaushal R, Bates DW, Landrigan C, et al. Medication errors and adverse drug events in pediatric inpatients. *JAMA* 2001;285:2114–20.
7. van den Bemt PMLA, Egberts TCG, de Jong-van den Berg LTW, Brouwers JRBJ. Drug-related problems in hospitalised patients. *Drug Saf* 2000; 22:321–33.

- 1  
2  
3 8. Rashed AN, Neubert A, Tomlin S, Jackman J, Alhamdan H, AlShaikh A, et al. Epidemiology  
4 and potential associated risk factors of drug-related problems in hospitalised children in the  
5 United Kingdom and Saudi Arabia. *Eur J Clin Pharmacol* 2012;68:1657–66.  
6  
7
- 8 9. Allegaert K, van den Anker JN. Adverse drug reactions in neonates and infants: a population-  
9 tailored approach is needed. *Br J Clin Pharmacol* 2015;80:788–95.  
10  
11
- 12 10. Fernandez-Llamazares CM, Calleja-Hernández M-Á, Manrique-Rodríguez S, Pérez-Sanz  
13 C, Durán-García E, Sanjurjo-Sáez M. Prescribing errors intercepted by clinical pharmacists in  
14 paediatrics and obstetrics in a tertiary hospital in Spain. *Eur J Clin Pharmacol* 2012;68:1339–  
15  
16  
17 45.  
18  
19
- 20 11. van den Anker JN. How to optimize the evaluation and use of antibiotics in neonates. *Early*  
21  
22  
23  
24  
25  
26  
27  
28  
29  
30  
31  
32  
33  
34  
35  
36  
37  
38  
39  
40  
41  
42  
43  
44  
45  
46  
47  
48  
49  
50  
51  
52  
53  
54  
55  
56  
57  
58  
59  
60
11. van den Anker JN. How to optimize the evaluation and use of antibiotics in neonates. *Early Hum Dev* 2014; 90:10S–12S.
12. Rodieux F, Wilboux M, van den Anker JN, Pfister M. Effect of Kidney Function on Drug Kinetics and Dosing in Neonates, Infants, and Children. *Clin Pharmacokinet.* 2015;54:1183–204.
13. Kunac DI, Kennedy J, Austin N, Reith D. Incidence, preventability, and impact of Adverse Drug Events (ADEs) and potential ADEs in hospitalized children in New Zealand: a prospective observational cohort study. *Paediatr Drugs* 2009; 11:153–60.
14. Sakuma M, Ida H, Nakamura T, Ohta Y, Yamamoto K, Seki S, et al. Adverse drug events and medication errors in Japanese paediatric inpatients: a retrospective cohort study. *BMJ Qual Saf* 2014;23:830–7.
15. Ohta Y, Sakuma M, Koike K, Bates DW, Morimoto T. Influence of adverse drug events on morbidity and mortality in intensive care units: the JADE study. *Int J Qual Health Care* 2014;26:573–8.
16. Urbina O, Ferrández O, Grau S, et al. Design of a score to identify hospitalized patients at risk of drug-related problems. *Pharmacoepidemiol Drug Saf* 2014;23: 923–32.

- 1  
2  
3 17. Apgar V. A proposal for a new method of evaluation of the newborn infant. *Curr Res*  
4  
5 *Anesth Analg* 1953;32:260–7.  
6  
7  
8 18. Chow S, Shao J, Wang H. *Sample Size Calculations in Clinical Research*. 2nd Ed. Boca  
9  
10 Raton, FL: Chapman & Hall/CRC Biostatistics Series 2008.  
11  
12 19. Birarra MK, Heye TB, Shibeshi W. Assessment of drug-related problems in pediatric ward  
13  
14 of Zewditu Memorial Referral Hospital, Addis Ababa, Ethiopia. *Int J Clin Pharm* 2017;39:1–8.  
15  
16 20. Khmour MR, Jarab AS, Adas HO, Samaro EZ, Mukattash TL, Hallak HO. Identification of  
17  
18 drug-related problems: a prospective study in two general hospitals. *Curr Clin Pharmacol*  
19  
20 2012;7:276–81.  
21  
22 21. Peterson C, Gustafsson M. Characterisation of drug-related problems and associated factors  
23  
24 at a clinical pharmacist service-naïve Hospital in Northern Sweden. *Drugs Real World*  
25  
26 *Outcomes* 2017;4:97–107.  
27  
28 22. Rashed AN, Wilton L, Lo CCH, Kwong BYS, Leung S, Wong ICK. Epidemiology and  
29  
30 potential risk factors of drug-related problems in Hong Kong paediatric wards. *Br J Clin*  
31  
32 *Pharmacol* 2014;77:873–9.  
33  
34 23. Blix HS, Viktil KK, Reikvam A, et al. The majority of hospitalised patients have drug-  
35  
36 related problems: results from a prospective study in general hospitals. *Eur J Clin Pharmacol*  
37  
38 2004;60:651–8.  
39  
40 24. American Academy of Pediatrics, Committee on Fetus and Newborn, American College of  
41  
42 Obstetricians and Gynecologists, Committee on Obstetric Practice. The Apgar Score. *Pediatrics*  
43  
44 2006;117:1444–7.  
45  
46 25. Pawluk S, Jaam M, Hazi F, et al. A description of medication errors reported by pharmacists  
47  
48 in a neonatal intensive care unit. *Int J Clin Pharm* 2017;39:88–94.  
49  
50  
51  
52  
53  
54  
55  
56  
57  
58  
59  
60

- 1  
2  
3 26. Stavroudis TA, Shore AD, Morlock L, Hicks RW, Bundy D, Miller MR. NICU medication  
4 errors: identifying a risk profile for medication errors in the neonatal intensive care unit. *J*  
5  
6 *Perinatol* 2010;459–68.  
7  
8  
9  
10 27. Wilbaux M, Fuchs A, Samardzic J, et al. Pharmacometric approaches to personalize use of  
11 primarily renally eliminated antibiotics in preterm and term neonates. *J Clin Pharmacol*  
12 2016;56:909–35.  
13  
14  
15  
16 28. Sherwin CMT, Medlicott NJ, Reith DM, Broadbent RS. Intravenous drug delivery in  
17 neonates: lessons learnt. *Arch Dis Child* 2014;99:590–4.  
18  
19  
20 29. Bradley JS, Wassel RT, Lee L, Nambiar S. Intravenous ceftriaxone and calcium in the  
21 neonate: assessing the risk for cardiopulmonary adverse events. *Pediatrics* 2009;123:e609 – 13.  
22  
23  
24 30. Kanji S, Lam J, Johanson C, Singh A, Goddard R, Fairbairn J, et al. Systematic review of  
25 physical and chemical compatibility of commonly used medications administered by  
26 continuous infusion in intensive care units. *Crit Care Med* 2010;38:1890–8.  
27  
28  
29 31. Foinard A, Décaudin B, Barthélémy C, Debaene B, Odou P. Impact of physical  
30 incompatibility on drug mass flow rates: example of furosemide-midazolam incompatibility.  
31 *Ann Intensive Care* 2012;2:28.  
32  
33  
34 32. Lewis AB, Freed MD, Heymann MA, Roehl SL, Kensey RC. Side effects of therapy with  
35 prostaglandin E1 in infants with critical congenital heart disease. *Circulation* 1981;64:893–8.  
36  
37  
38 33. Levy M, Koren G, Dupuis L, Read SE. Vancomycin-induced red man syndrome. *Pediatrics*  
39 1990;86:572–80.  
40  
41  
42  
43  
44  
45  
46  
47  
48  
49  
50  
51  
52  
53  
54  
55  
56  
57  
58  
59  
60



Table 1 – Demographic and clinical characteristics of the study population (n = 600)

| Characteristics                   | Value*       |
|-----------------------------------|--------------|
| Gestational age (weeks)           | 32.1±4.1     |
| Female sex                        | 265 (45.1%)  |
| Birth weight (kilograms)          | 1.80±0.88    |
| Length of stay (days)             | 13 (2 – 278) |
| Vaginal delivery                  | 207 (35.2%)  |
| PROM                              | 162 (31.5%)  |
| 1-minute APGAR < 7                | 266 (45.8%)  |
| 5-minute APGAR < 7                | 76 (12.9%)   |
| Number of clinical conditions     | 4.7±2.6      |
| Neurological disorders            | 49 (8.2%)    |
| Renal disorders                   | 52 (8.7%)    |
| Cardiac disorders                 | 107 (17.9%)  |
| Malformations                     | 69 (11.5%)   |
| Number of medications used        | 8.2±6.0      |
| DRP (n=1,115)                     |              |
| Patients with DRP                 | 363 (60.5%)  |
| Average number of DRP per patient | 1.9 ± 2.6    |
| Death                             | 68 (11.3%)   |

\*Values are mean±standard deviation, median (range), or n (%).

PROM, premature rupture of membranes; DRP, drug-related problems.

Table 2– Factors associated with occurrence of drug-related problems in neonatal intensive care

| Variables                      | Univariate analysis |       |       | Multivariate analysis |       |      |      |        |
|--------------------------------|---------------------|-------|-------|-----------------------|-------|------|------|--------|
|                                | OR                  | 95%CI | p     | AOR                   | 95%CI | p    |      |        |
| Collected at patient admission |                     |       |       |                       |       |      |      |        |
| Gestational age in weeks       | 0.87                | 0.83  | 0.91  | <0.001                | 0.85  | 0.81 | 0.89 | 0.003  |
| Female sex                     | 1.32                | 0.94  | 1.84  | 0.105                 |       |      |      |        |
| Birth weight (kilograms)       | 0.55                | 0.46  | 0.68  | <0.001                |       |      |      |        |
| Vaginal delivery               | 1.49                | 1.10  | 2.12  | 0.025                 |       |      |      |        |
| PROM                           | 1.21                | 0.83  | 1.78  | 0.322                 |       |      |      |        |
| 1-minute APGAR <7              | 1.49                | 1.06  | 2.08  | 0.020                 |       |      |      |        |
| 5-minute APGAR <7              | 2.03                | 1.18  | 3.48  | 0.010                 | 1.74  | 1.00 | 3.13 | 0.050  |
| Neurological disorder          | 2.12                | 1.09  | 4.17  | 0.028                 | 2.49  | 1.09 | 5.69 | 0.031  |
| Renal disorder                 | 8.90                | 3.17  | 25.04 | <0.001                | 5.75  | 1.85 | 17.8 | 0.002  |
| Cardiac disorder               | 2.08                | 1.31  | 3.32  | <0.001                | 2.36  | 1.31 | 4.24 | 0.004  |
| Malformations                  | 1.35                | 0.79  | 2.29  | 0.267                 |       |      |      |        |
| Collected at NICU discharge    |                     |       |       |                       |       |      |      |        |
| Number of unique medications   | 1.36                | 1.28  | 1.44  | <0.001                | 1.22  | 1.13 | 1.32 | <0.001 |
| Length of stay in days         | 1.08                | 1.06  | 1.10  | <0.001                | 1.04  | 1.02 | 1.06 | <0.001 |
| Number of clinical problems    | 1.60                | 1.44  | 1.77  | <0.001                | 1.22  | 1.13 | 1.32 | <0.001 |

OR, odds-ratio; CI, confidence interval; AOR, adjusted odds-ratio; PROM, premature rupture of membranes.

Table 3 – Estimates of the risk of drug-related problems (DRP) associated with several drugs administered in NICUs, distributed by cases of DRP and frequency of prescription

| Medicines      | Adjusted Odds-ratio<br>(95%CI)* | Cases of DRP |       | Frequency of prescriptions |       |
|----------------|---------------------------------|--------------|-------|----------------------------|-------|
|                |                                 | n            | %     | n                          | %     |
| Amphotericin B | 4.80 (1.49 – 15.40)             | 46           | 3.7   | 48                         | 1.0   |
| Meropenem      | 4.09 (1.74 – 9.60)              | 100          | 8.0   | 152                        | 3.1   |
| Alprostadir    | 3.38 (1.67 – 6.84)              | 16           | 1.3   | 33                         | 0.7   |
| Vancomycin     | 3.34 (1.17– 9.52)               | 97           | 7.7   | 100                        | 2.0   |
| Ciprofloxacin  | 3.03 (1.34 – 6.85)              | 13           | 1.0   | 24                         | 0.5   |
| Gentamicin     | 2.43 (1.00 – 5.89)              | 211          | 16.9  | 518                        | 10.5  |
| Cefepime       | 1.88 (1.13 – 3.13)              | 38           | 3.0   | 193                        | 3.9   |
| Amikacin       | 1.82 (1.09 – 3.07)              | 73           | 5.8   | 181                        | 3.7   |
| Omeprazole     | 1.66 (1.02 – 2.59)              | 28           | 2.2   | 146                        | 3.0   |
| Others         |                                 | 630          | 50.3  | 3,522                      | 71.6  |
| Total          |                                 | 1,252        | 100.0 | 4,917                      | 100.0 |

\*Odds ratio adjusted for gestational age, 5-minute APGAR <7, neurological disorder, renal disorder and cardiac disorder. The *p*-value for each medicine was < 0.05.

CI, confidence interval.

Table 4 – Type and frequency of the causes of DRP in medicines associated with high-risk of drug-related problems (DRP) in neonatal intensive care

| Medicines      | Causes of DRP* |                |                  |             |           |
|----------------|----------------|----------------|------------------|-------------|-----------|
|                | Drug selection | Dose selection | Drug use process | Logistics   | Others†   |
| Amphotericin B |                | 7 (15.2%)      | 21 (45.7%)       | 11 (23.9%)  | 7 (15.2%) |
| Meropenem      | 1 (1.0%)       | 38 (38.0%)     | 25 (25.0%)       | 29 (29.0%)  | 7 (7.0%)  |
| Alprostadi     |                | 2 (12.5%)      | 6 (37.5%)        |             | 8 (50.0%) |
| Vancomycin     | 1 (1.0%)       | 28 (28.9%)     | 24 (24.74%)      | 40 (41.24%) | 4 (4.12%) |
| Ciprofloxacin  | 3 (23.08%)     | 4 (30.77%)     | 2 (15.38%)       | 4 (30.77%)  |           |
| Gentamicin     |                | 132 (62.6%)    | 73 (34.6%)       | 4 (1.9%)    | 2 (0.9%)  |
| Cefepime       |                | 16 (42.1%)     | 10 (26.32%)      | 11 (28.95%) | 1 (2.63%) |
| Amikacin       |                | 47 (64.4%)     | 14 (19.2%)       | 8 (10.9%)   | 4 (5.5%)  |
| Omeprazole     |                | 1 (3.57%)      | 15 (53.57%)      | 12 (42.86%) |           |

\*Causes of DRP according to the Pharmaceutical Care Network Europe (PCNE) classification system v.6.2.<sup>4</sup>

†Others included drug form, treatment duration, and others specific causes (e. g. adverse reaction and wrong drug preparation technique).

Supplementary file 1 – PCNE systems v6.2 and operational definitions of the study for the classification of drug related problems (DRP)

| <b>Code – Categories</b>                                                                          | <b>Operational definition</b>                                                                                                                                                                      |
|---------------------------------------------------------------------------------------------------|----------------------------------------------------------------------------------------------------------------------------------------------------------------------------------------------------|
| <b>Problems</b>                                                                                   |                                                                                                                                                                                                    |
| P1 – Treatment effectiveness                                                                      | There is a (potential) problem with the (lack of) effect of the pharmacotherapy.                                                                                                                   |
| P1.1 – No effect of drug treatment/therapy failure                                                | The drug treatment cannot lead or does not lead to the improvement of the patient's symptoms (e.g. early sepsis not responsive to treatment of ampicillin and gentamicin).                         |
| P1.2 – Effect of drug treatment not optimal                                                       | The drug treatment may lead or lead to a partial improvement of the patient's symptoms (e.g. paracetamol sub-dose leading to a partial pain relief).                                               |
| P1.3 – Wrong effect of drug treatment                                                             | Not applicable for the study.                                                                                                                                                                      |
| P1.4 – Untreated indication                                                                       | There are symptoms that need treatment but are not being treated at the moment (e.g. patient has a fever but is not in drug treatment).                                                            |
| P2 – Adverse reactions                                                                            | Patient suffers, or will possibly suffer, from an adverse drug event.                                                                                                                              |
| P2.1 – Non-allergic adverse drug event                                                            | The drug treatment may be related to an unintended, non-allergic adverse event with doses normally used for the intended indication (e.g. tachycardia reportedly related to the use of caffeine).  |
| P2.2 – Allergic adverse drug event                                                                | The drug treatment may be related to an unintended, allergic adverse event with doses normally used for the intended indication (e.g. skin rash reportedly related to the use of penicillin).      |
| P2.3 – Toxic adverse drug-event                                                                   | The drug treatment may lead or lead to an unintended adverse event occurring in doses higher than that normally used for the intended indication (e.g. captopril overdose leading to hypotension). |
| P3 – Treatment costs                                                                              | The drug treatment is more expensive than necessary.                                                                                                                                               |
| P3.1 – Drug treatment more costly than necessary                                                  | The medicine is more expensive than other medicines available or there is a waste in its preparation (reconstitution and dilution).                                                                |
| P3.2 – Unnecessary drug-treatment                                                                 | The prescribed medication is not necessary or no longer necessary.                                                                                                                                 |
| P4 – Others                                                                                       | Other problems not specified above                                                                                                                                                                 |
| P4.1 – Patient dissatisfied with therapy despite optimal clinical and economic treatment outcomes | Not applicable for the study.                                                                                                                                                                      |
| P4.2 – Unclear problem/complaint                                                                  | Problem not clarified or without defined classification.                                                                                                                                           |

| Causes                                                                     |                                                                                                                                                                                                                                                                                          |
|----------------------------------------------------------------------------|------------------------------------------------------------------------------------------------------------------------------------------------------------------------------------------------------------------------------------------------------------------------------------------|
| C1 – Drug selection                                                        | The cause of the DRP is related to the selection of the drug.                                                                                                                                                                                                                            |
| C1.1 – Inappropriate drug (including contraindication)                     | Selected drug is inappropriate for the intended indication or is contraindicated for the patient (e.g. ampicillin prescribed to allergic patient).                                                                                                                                       |
| C1.2 – No indication for drug                                              | There is no indication for the selected drug.                                                                                                                                                                                                                                            |
| C1.3 – Inappropriate combination of drugs, or drugs and food               | The selected drug interacts or may interact physically, physico-chemical or chemically with other drugs or foods (e.g. patient is receiving ciprofloxacin and fluconazole, medicines that may increase the risk of QT interval prolongation and, consequently, ventricular arrhythmias). |
| C1.4 – Inappropriate duplication of therapeutic group or active ingredient | The physician order inappropriately has medicines of same therapeutic group or active ingredients to treat different symptoms (e.g. ibuprofen indicated for closure of the ductus arteriosus and paracetamol indicated for fever present in the same physician order).                   |
| C1.5 – Indication for drug-treatment not noticed                           | The appropriate drug is not used to treat the symptom because the existence of the symptom is not noticed (e.g. patient has a fever that is not noticed and, therefore, is not in drug treatment).                                                                                       |
| C1.6 – Too many drugs prescribed for indication                            | The physician order inappropriately has medicines indicated to treat the same symptoms (e.g. ranitidine and omeprazole both indicated for gastrointestinal haemorrhage present in the same physician order).                                                                             |
| C1.7 – More cost-effective drug available                                  | There are cheaper and effective (or more effective) medications to treat the symptoms.                                                                                                                                                                                                   |
| C1.8 – Synergistic/preventive drug required and not given                  | There is a requirement to use a medication to improve an existing treatment or to prevent the development of another symptom, but it is not used. (e.g. ferrous sulfate requirement for the prevention of anemia).                                                                       |
| C1.8 – New indication for drug treatment presented                         | The patient presents a new symptom that is not being treated (e.g. patient has a recent fever and requires drug treatment).                                                                                                                                                              |
| C2 – Drug form                                                             | The cause of the DRP is related to the selection of the drug form.                                                                                                                                                                                                                       |
| C2.1 – Inappropriate drug form                                             | The drug has an inappropriate form and/or formula for the patient (e.g. oral caffeine solution prescribed for neonate with feeding intolerance).                                                                                                                                         |
| C3 – Dose selection                                                        | The cause of the DRP is related to the selection of the dosage schedule.                                                                                                                                                                                                                 |
| C3.1 – Drug dose too low                                                   | Selected dose is 20% lower than the minimum dose defined for the intended indication (e.g.                                                                                                                                                                                               |

|                                                                             |                                                                                                                                                                     |
|-----------------------------------------------------------------------------|---------------------------------------------------------------------------------------------------------------------------------------------------------------------|
|                                                                             | cefepime prescribed 45 mg/kg instead of 60 mg/kg daily).                                                                                                            |
| C3.2 – Drug dose too high                                                   | Selected dose is 20% higher than the maximum dose defined for the intended indication (e.g. oxacillin prescribed 150 mg/kg instead of 100 mg/kg daily).             |
| C3.4 – Dosage regimen not frequent enough                                   | Selected dosing frequency is less than that defined for the intended indication (e.g. gentamicin prescribed every 48 hours instead of every 36 hours).              |
| C3.5 – Dosage regimen too frequent                                          | Selected dosing frequency is higher than that defined for the intended indication (e.g. amikacin prescribed every 24 hours instead of every 36 hours).              |
| C3.6 – No therapeutic drug monitoring                                       | Monitoring serum levels of the drug is required, but it is not done.                                                                                                |
| C3.7 – Pharmacokinetic problem requiring dose adjustment                    | Not applicable for the study.                                                                                                                                       |
| C3.8 – Deterioration/improvement of disease state requiring dose adjustment | Change in disease state requiring dose adjustment (e.g. vancomycin dose adjustment because of the improvement in renal function in patients with renal impairment). |
| C4 – Treatment duration                                                     | The cause of the DRP is related to the duration of therapy.                                                                                                         |
| C4.1 – Duration of treatment too short                                      | Duration of treatment is shorter than that defined for the indication treated (e.g. penicillin prescribed for eight days instead of ten days).                      |
| C4.2 – Duration of treatment too long                                       | Duration of treatment is longer than that defined for the indication treated (e.g. meropenem prescribed for sixteen days instead of fourteen days).                 |
| C5 – Drug use process                                                       | The cause of the DRP can be related to the way the patient uses the drug, in spite of proper dosage instructions (on the label).                                    |
| C5.1 – Inappropriate timing of administration and/or dosing intervals       | Drug administered at wrong times or intervals (e.g. gentamicin dose scheduled for 16 hours but administered at 18 hours).                                           |
| C5.2 – Drug under-administered                                              | Drug administered at a frequency lower than the physician order (e.g. ranitidine prescribed twice daily but administered only once).                                |
| C5.3 – Drug over-administered                                               | Drug administered at a frequency higher than the physician order (e.g. aminophylline prescribed twice daily but administered three times).                          |
| C5.4 – Drug not taken/administered at all                                   | Drug dose is not administered in full (e.g. ampicillin dose administered in half).                                                                                  |
| C5.5 – Wrong drug administered                                              | Drug is administered wrong (e.g. norepinephrine was administered in the wrong route).                                                                               |

|                                                          |                                                                                                                                                                                                              |
|----------------------------------------------------------|--------------------------------------------------------------------------------------------------------------------------------------------------------------------------------------------------------------|
| C5.6 – Drug abused (unregulated overuse)                 | Not applicable for the study.                                                                                                                                                                                |
| C5.7 – Patient unable to use drug/form as directed       | Not applicable for the study.                                                                                                                                                                                |
| C6 – Logistics                                           | The cause of the DRP can be related to the logistics of the prescribing and dispensing process.                                                                                                              |
| C6.1 – Prescribed drug not available                     | Prescribed drug is not available in the institution and there is no other effective drug (e.g. ursodiol is prescribed but not available in the hospital and there is no other drug alternative).             |
| C6.2 – Prescribing error (necessary information missing) | Missing necessary information on the drug prescription that may generate a medication error (e.g. vancomycin is prescribed, but there is no information on the minimum recommended time for administration). |
| C6.3 – Dispensing error (wrong drug or dose dispensed)   | Drug is dispensed wrong or dispensed in the wrong dosage form or dose (e.g. dispensed intravenous furosemide instead of oral).                                                                               |
| C7 – Patient                                             | The cause of the DRP can be related to the personality or behaviour of the patient.                                                                                                                          |
| C7.1 – Patient forgets to use/take drug                  | Not applicable for the study.                                                                                                                                                                                |
| C7.2 – Patient uses unnecessary drug                     | Not applicable for the study.                                                                                                                                                                                |
| C7.3 – Patient takes food that interacts                 | Not applicable for the study.                                                                                                                                                                                |
| C7.4 – Patient stored drug inappropriately               | Not applicable for the study.                                                                                                                                                                                |
| C8 – Others                                              | Other causes not specified above.                                                                                                                                                                            |
| C8.1 – Others specific causes                            | The problem arises due to other specific causes (e.g. adverse events related to alprostadil, cefepime prepared wrongly and etc.).                                                                            |
| C8.2 – No obvious cause                                  | Not applicable for the study.                                                                                                                                                                                |



**STROBE 2007 (v4) checklist of items to be included in reports of observational studies in epidemiology\***  
**Checklist for cohort, case-control, and cross-sectional studies (combined)**

| Section/Topic             | Item # | Recommendation                                                                                                                                                                                                                                                                                                                                                                                                                                                         | Reported on page # |
|---------------------------|--------|------------------------------------------------------------------------------------------------------------------------------------------------------------------------------------------------------------------------------------------------------------------------------------------------------------------------------------------------------------------------------------------------------------------------------------------------------------------------|--------------------|
| Title and abstract        | 1      | (a) Indicate the study's design with a commonly used term in the title or the abstract                                                                                                                                                                                                                                                                                                                                                                                 | 2                  |
|                           |        | (b) Provide in the abstract an informative and balanced summary of what was done and what was found                                                                                                                                                                                                                                                                                                                                                                    | 2                  |
| <b>Introduction</b>       |        |                                                                                                                                                                                                                                                                                                                                                                                                                                                                        |                    |
| Background/rationale      | 2      | Explain the scientific background and rationale for the investigation being reported                                                                                                                                                                                                                                                                                                                                                                                   | 4                  |
| Objectives                | 3      | State specific objectives, including any pre-specified hypotheses                                                                                                                                                                                                                                                                                                                                                                                                      | 4/5                |
| <b>Methods</b>            |        |                                                                                                                                                                                                                                                                                                                                                                                                                                                                        |                    |
| Study design              | 4      | Present key elements of study design early in the paper                                                                                                                                                                                                                                                                                                                                                                                                                | 5                  |
| Setting                   | 5      | Describe the setting, locations, and relevant dates, including periods of recruitment, exposure, follow-up, and data collection                                                                                                                                                                                                                                                                                                                                        | 5                  |
| Participants              | 6      | (a) <i>Cohort study</i> —Give the eligibility criteria, and the sources and methods of selection of participants. Describe methods of follow-up<br><i>Case-control study</i> —Give the eligibility criteria, and the sources and methods of case ascertainment and control selection. Give the rationale for the choice of cases and controls<br><i>Cross-sectional study</i> —Give the eligibility criteria, and the sources and methods of selection of participants | 5                  |
|                           |        | (b) <i>Cohort study</i> —For matched studies, give matching criteria and number of exposed and unexposed<br><i>Case-control study</i> —For matched studies, give matching criteria and the number of controls per case                                                                                                                                                                                                                                                 |                    |
| Variables                 | 7      | Clearly define all outcomes, exposures, predictors, potential confounders, and effect modifiers. Give diagnostic criteria, if applicable                                                                                                                                                                                                                                                                                                                               | 5                  |
| Data sources/ measurement | 8*     | For each variable of interest, give sources of data and details of methods of assessment (measurement). Describe comparability of assessment methods if there is more than one group                                                                                                                                                                                                                                                                                   | 5                  |
| Bias                      | 9      | Describe any efforts to address potential sources of bias                                                                                                                                                                                                                                                                                                                                                                                                              | 5                  |
| Study size                | 10     | Explain how the study size was arrived at                                                                                                                                                                                                                                                                                                                                                                                                                              | 5/6                |
| Quantitative variables    | 11     | Explain how quantitative variables were handled in the analyses. If applicable, describe which groupings were chosen and why                                                                                                                                                                                                                                                                                                                                           | 6                  |
| Statistical methods       | 12     | (a) Describe all statistical methods, including those used to control for confounding                                                                                                                                                                                                                                                                                                                                                                                  | 6                  |
|                           |        | (b) Describe any methods used to examine subgroups and interactions                                                                                                                                                                                                                                                                                                                                                                                                    | 6                  |
|                           |        | (c) Explain how missing data were addressed                                                                                                                                                                                                                                                                                                                                                                                                                            | 6                  |
|                           |        | (d) <i>Cohort study</i> —If applicable, explain how loss to follow-up was addressed<br><i>Case-control study</i> —If applicable, explain how matching of cases and controls was addressed                                                                                                                                                                                                                                                                              |                    |

|                          |     |                                                                                                                                                                                                              |        |
|--------------------------|-----|--------------------------------------------------------------------------------------------------------------------------------------------------------------------------------------------------------------|--------|
|                          |     | <i>Cross-sectional study</i> —If applicable, describe analytical methods taking account of sampling strategy                                                                                                 |        |
|                          |     | (e) Describe any sensitivity analyses                                                                                                                                                                        |        |
| <b>Results</b>           |     |                                                                                                                                                                                                              |        |
| Participants             | 13* | (a) Report numbers of individuals at each stage of study—eg numbers potentially eligible, examined for eligibility, confirmed eligible, included in the study, completing follow-up, and analysed            | 6      |
|                          |     | (b) Give reasons for non-participation at each stage                                                                                                                                                         | 6      |
|                          |     | (c) Consider use of a flow diagram                                                                                                                                                                           |        |
| Descriptive data         | 14* | (a) Give characteristics of study participants (eg demographic, clinical, social) and information on exposures and potential confounders                                                                     | 6/7    |
|                          |     | (b) Indicate number of participants with missing data for each variable of interest                                                                                                                          | 7      |
|                          |     | (c) <i>Cohort study</i> —Summarise follow-up time (eg, average and total amount)                                                                                                                             | 6      |
| Outcome data             | 15* | <i>Cohort study</i> —Report numbers of outcome events or summary measures over time                                                                                                                          | 7      |
|                          |     | <i>Case-control study</i> —Report numbers in each exposure category, or summary measures of exposure                                                                                                         |        |
|                          |     | <i>Cross-sectional study</i> —Report numbers of outcome events or summary measures                                                                                                                           |        |
| Main results             | 16  | (a) Give unadjusted estimates and, if applicable, confounder-adjusted estimates and their precision (eg, 95% confidence interval). Make clear which confounders were adjusted for and why they were included | 7/8    |
|                          |     | (b) Report category boundaries when continuous variables were categorized                                                                                                                                    |        |
|                          |     | (c) If relevant, consider translating estimates of relative risk into absolute risk for a meaningful time period                                                                                             |        |
| Other analyses           | 17  | Report other analyses done—eg analyses of subgroups and interactions, and sensitivity analyses                                                                                                               | 7/8    |
| <b>Discussion</b>        |     |                                                                                                                                                                                                              |        |
| Key results              | 18  | Summarise key results with reference to study objectives                                                                                                                                                     | 8      |
| Limitations              | 19  | Discuss limitations of the study, taking into account sources of potential bias or imprecision. Discuss both direction and magnitude of any potential bias                                                   | 11     |
| Interpretation           | 20  | Give a cautious overall interpretation of results considering objectives, limitations, multiplicity of analyses, results from similar studies, and other relevant evidence                                   | 8/9/10 |
| Generalisability         | 21  | Discuss the generalisability (external validity) of the study results                                                                                                                                        | 11     |
| <b>Other information</b> |     |                                                                                                                                                                                                              |        |
| Funding                  | 22  | Give the source of funding and the role of the funders for the present study and, if applicable, for the original study on which the present article is based                                                | 12     |

\*Give information separately for cases and controls in case-control studies and, if applicable, for exposed and unexposed groups in cohort and cross-sectional studies.

**Note:** An Explanation and Elaboration article discusses each checklist item and gives methodological background and published examples of transparent reporting. The STROBE checklist is best used in conjunction with this article (freely available on the Web sites of PLoS Medicine at <http://www.plosmedicine.org/>, Annals of Internal Medicine at <http://www.annals.org/>, and Epidemiology at <http://www.epidem.com/>). Information on the STROBE Initiative is available at [www.strobe-statement.org](http://www.strobe-statement.org).
